# Supplementary material for: Multi-substituted 8-aminoimidazo[1,2-a]pyrazines by Groebke–Blackburn–Bienaymé reaction and their Hsp90 inhibitory activity
Source: Royal Society of Chemistry journal article supplement (doi:10.1039/c4ob01865f), 2014-11-19
Supplement: c4ob01865f2.pdf [file c4ob01865f2.pdf]

## SUPPORTING INFORMATION

### **Multi-substituted 8-Aminoimidazo[1,2-*a*]pyrazines by Groebke-Blackburn-Bienaymé Reaction and Their Hsp90 Inhibitory Activity**

*Jing Ren,<sup>1,#</sup> Min Yang,<sup>2,#</sup> Hongchun Liu,<sup>3</sup> Danyan Cao,<sup>1</sup> Danqi Chen,<sup>1</sup> Jian Li,<sup>2</sup> Le Tang,<sup>1</sup>*

*Jianhua He,<sup>2</sup> Yue-Lei Chen,<sup>1,\*</sup> Meiyu Geng,<sup>3</sup> Bing Xiong,<sup>1,\*</sup> and Jingkang Shen<sup>1,\*</sup>*

<sup>1</sup> Medicinal Chemistry Department, Shanghai Institute of Materia Medica, Chinese Academy of Sciences, 555 Zuchongzhi Road, Shanghai 201203, P. R. China.

<sup>2</sup> Shanghai Institute of Applied Physics, Chinese Academy of Sciences, 239 Zhang Heng Road, Shanghai 201203, P. R. China.

<sup>3</sup> Division of Antitumor Pharmacology, Shanghai Institute of Materia Medica, Chinese Academy of Sciences, 555 Zuchongzhi Road, Shanghai 201203, P. R. China.

*E-mail:* [bxiong@simmm.ac.cn](mailto:bxiong@simmm.ac.cn)

<sup>1</sup>H and <sup>13</sup>C NMR Spectrum of compounds

2-22

# Compound 2

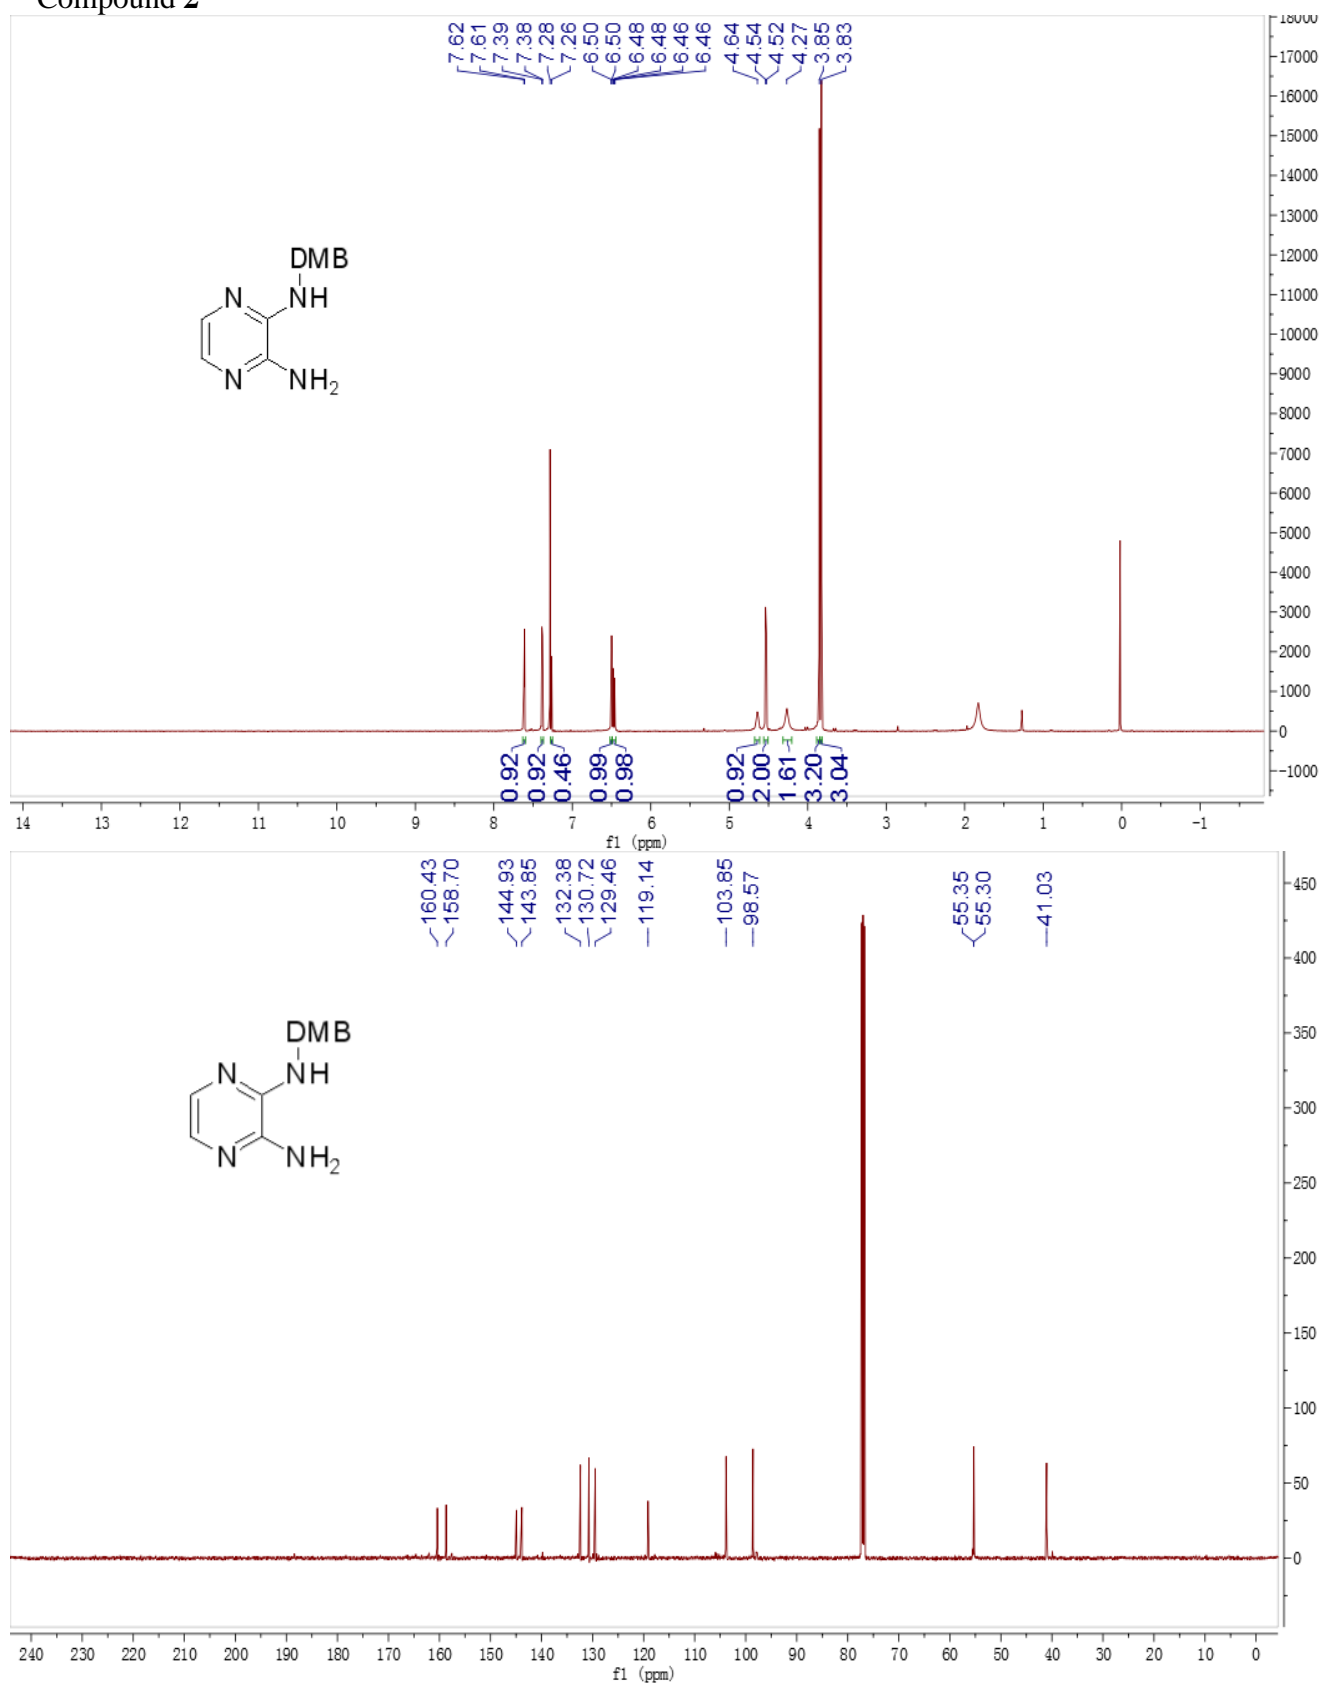

# Compound 6

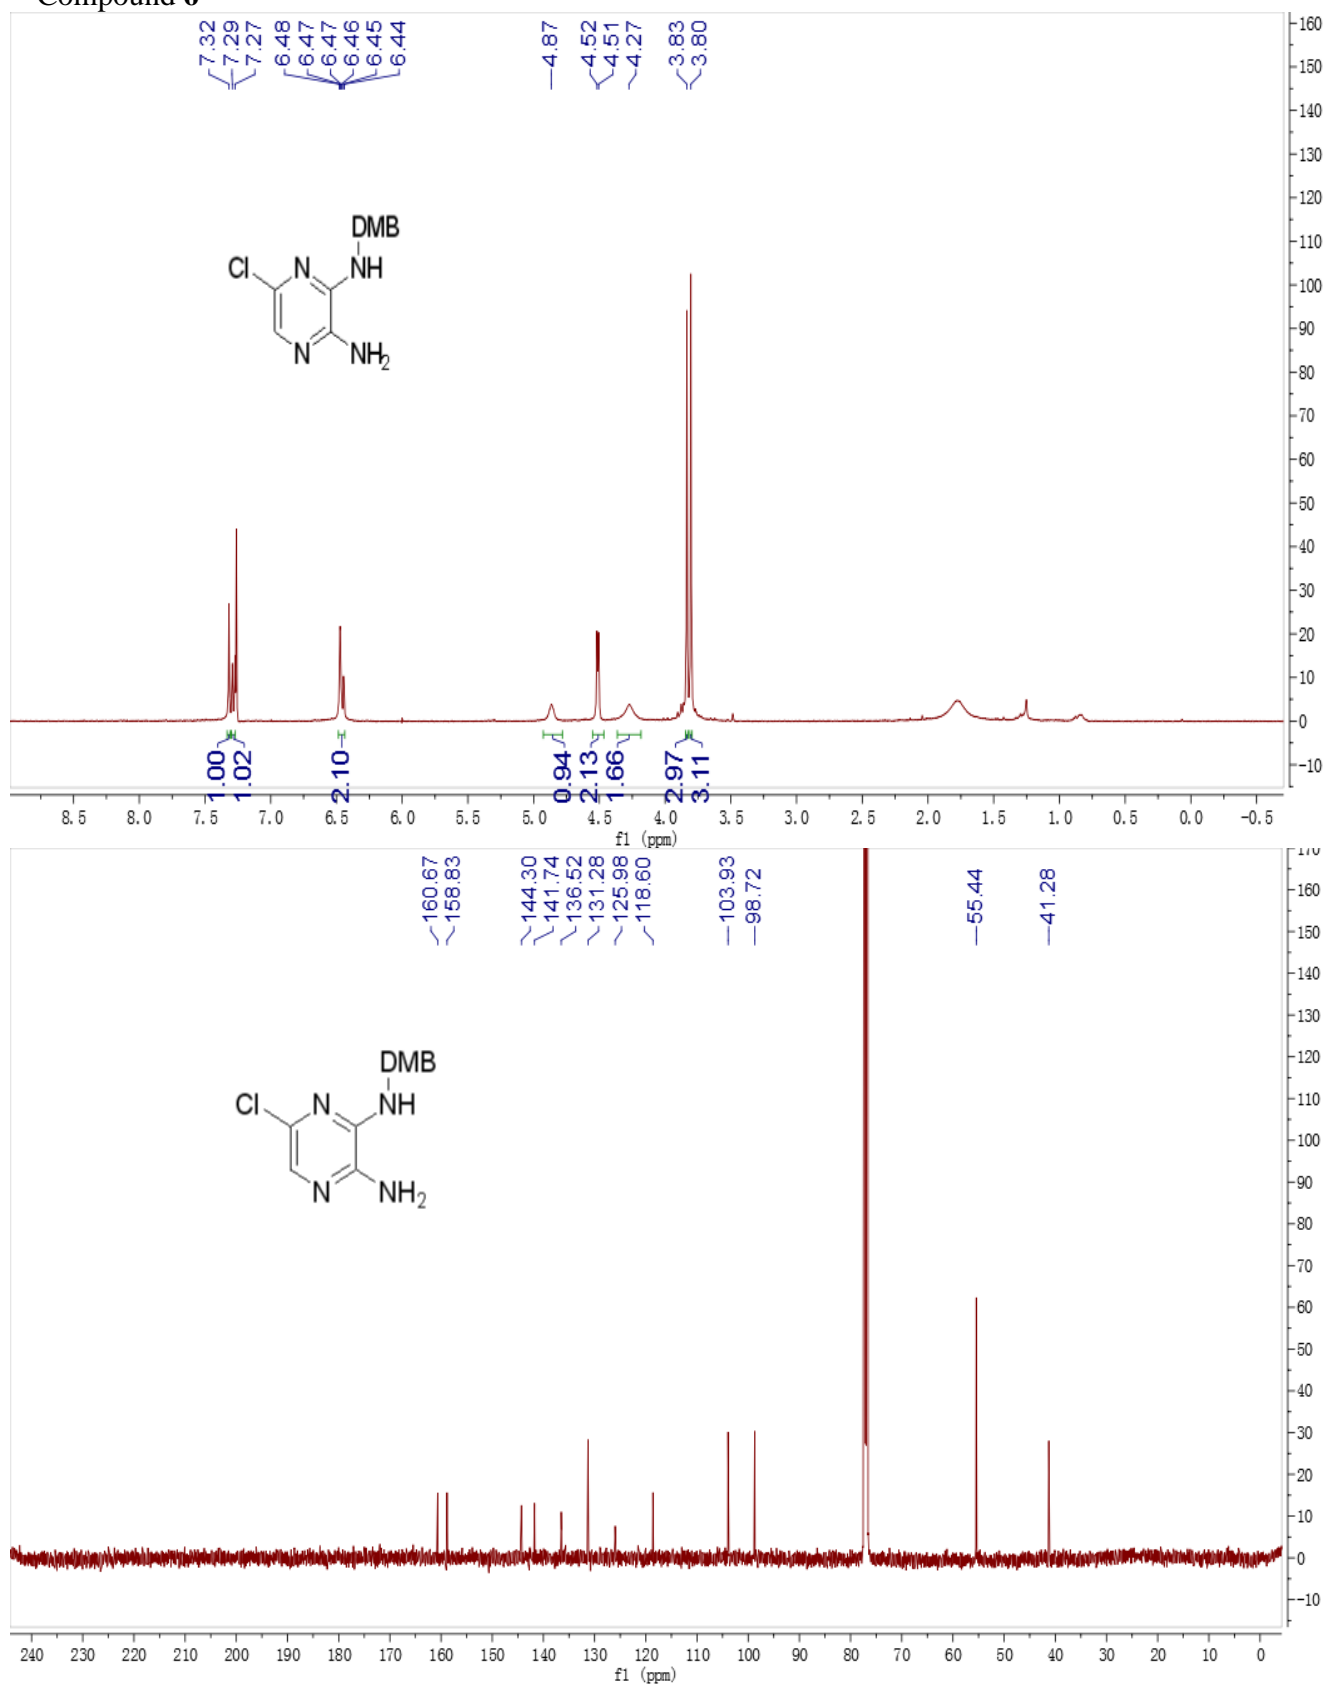

# Compound 28

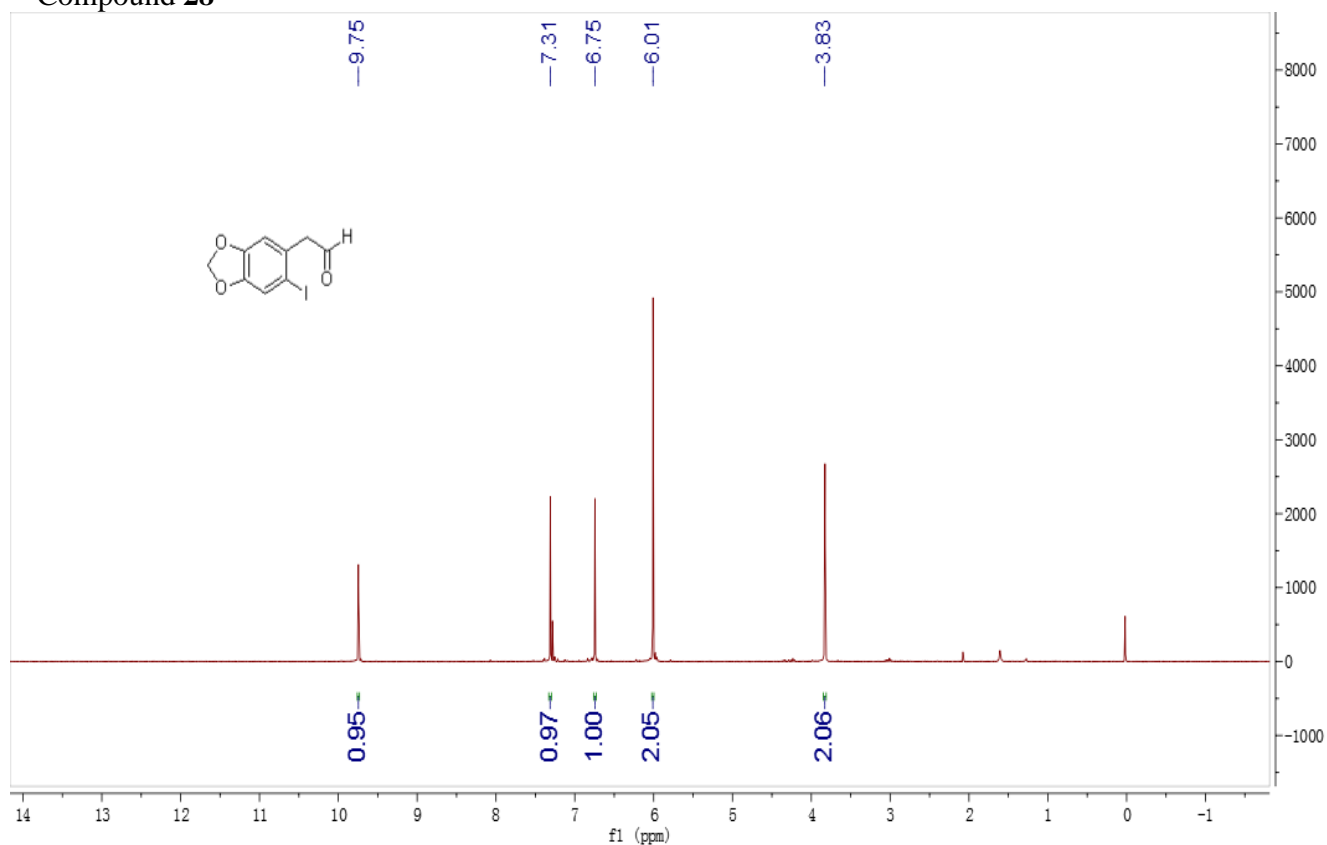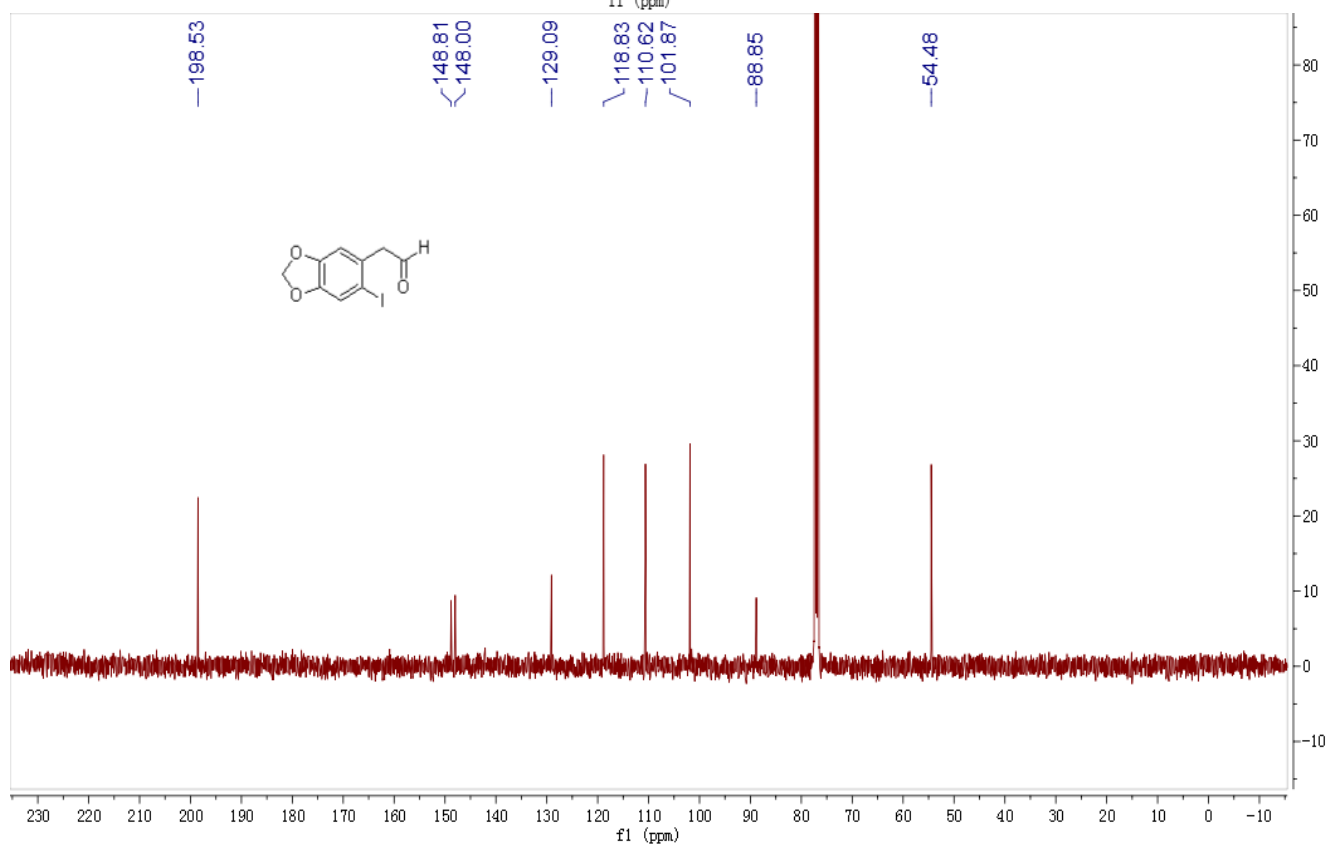

# Compound 5

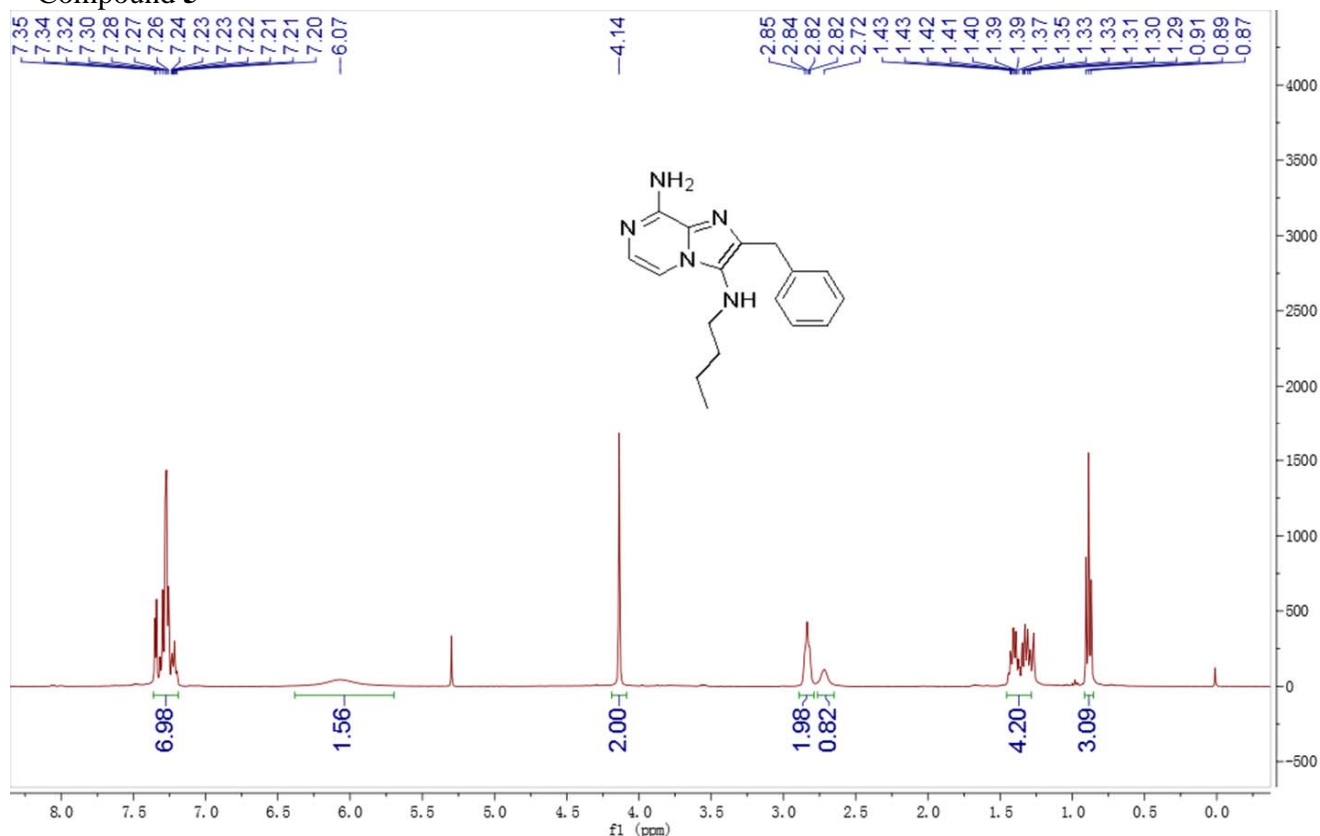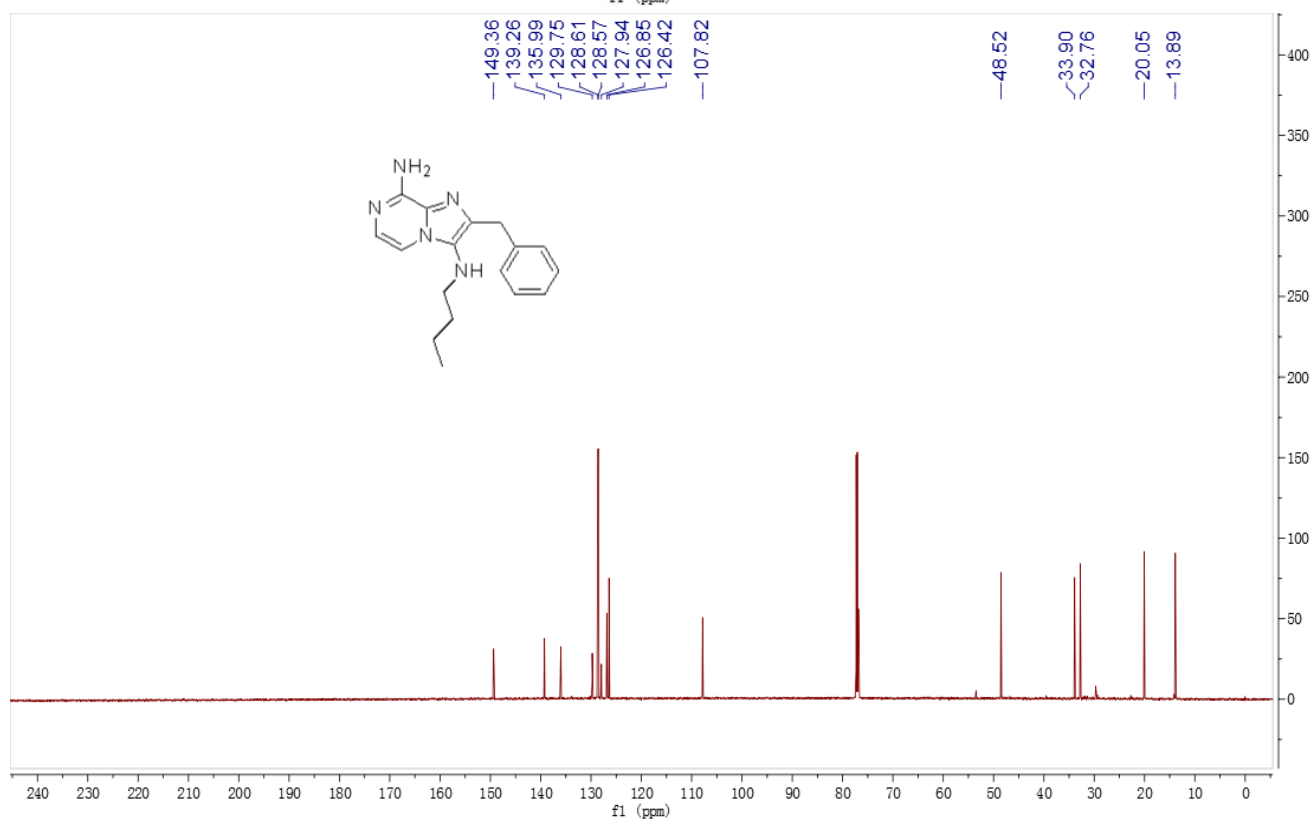

# Compound 17

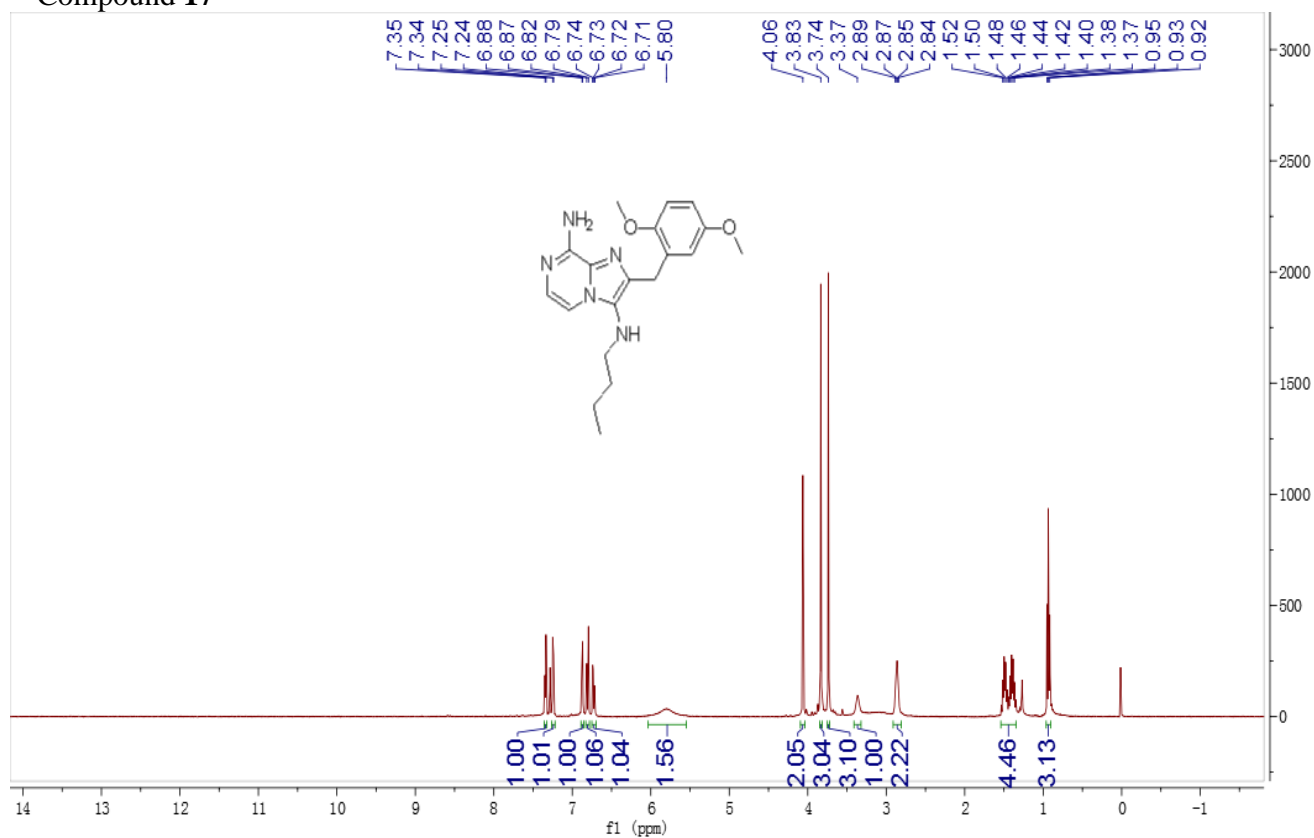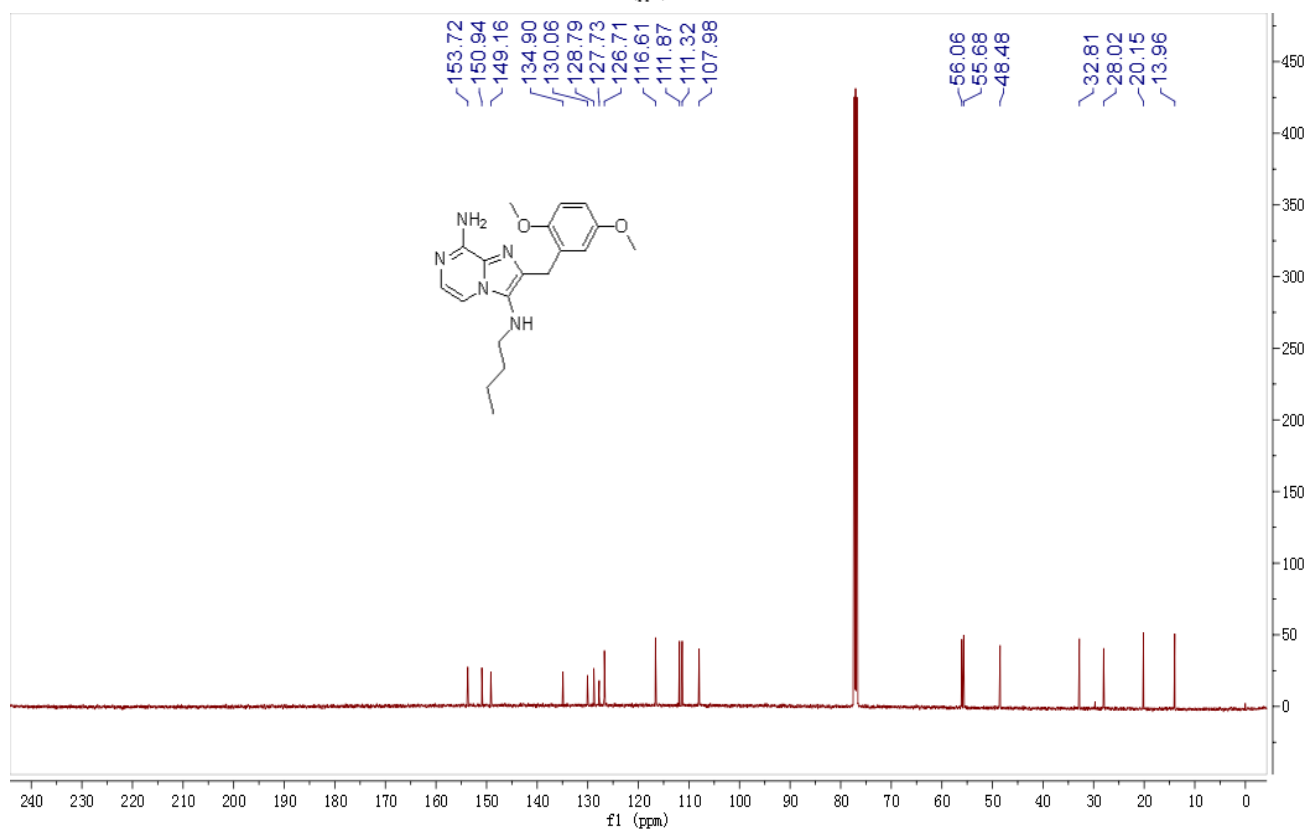

# Compound 18

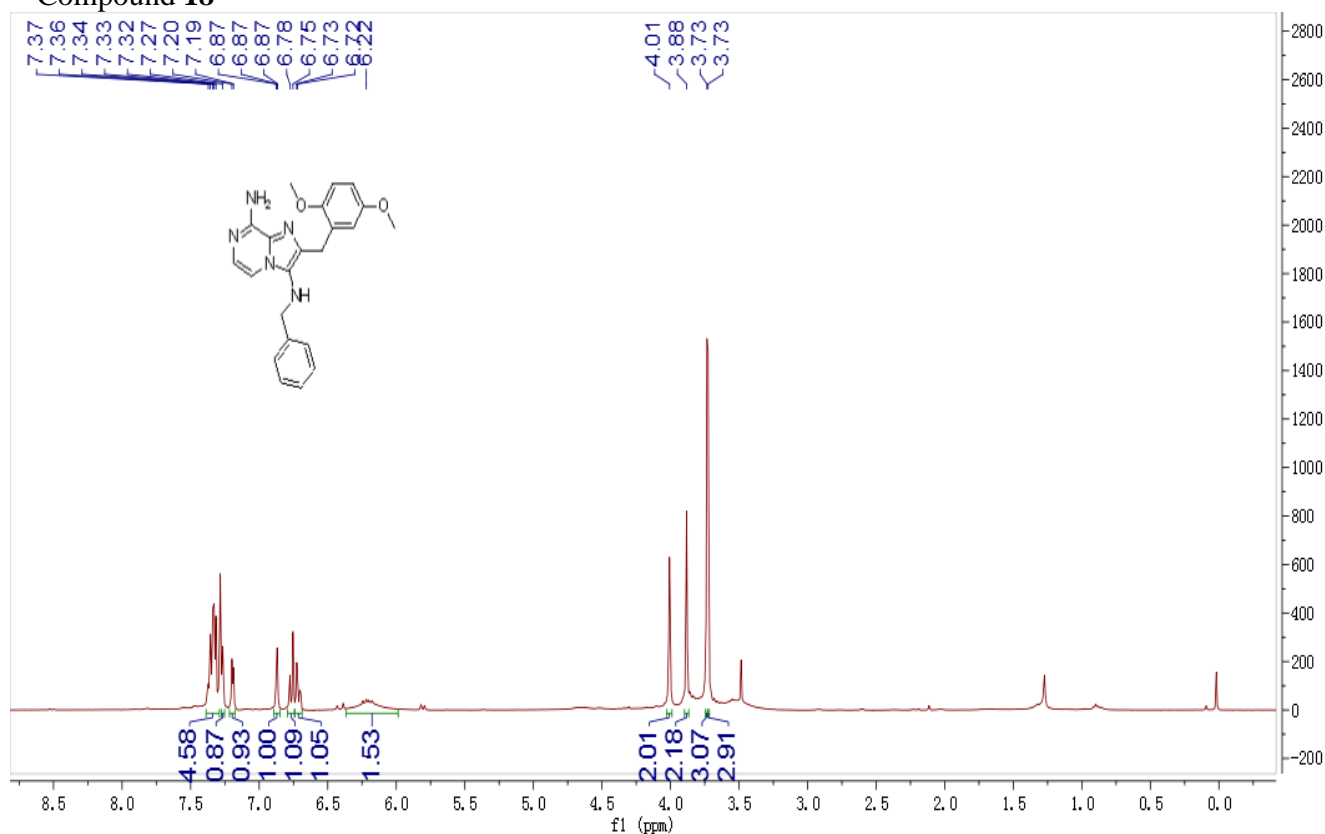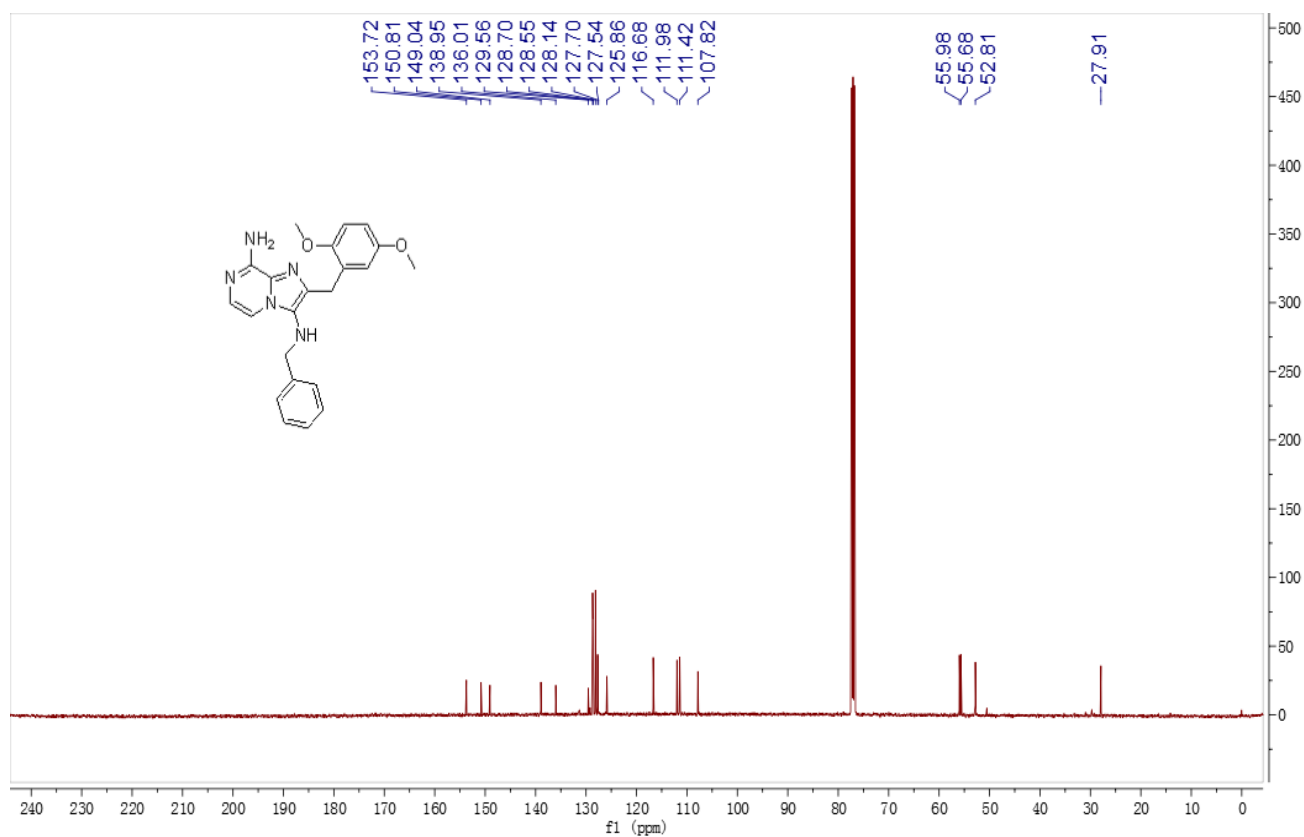

# Compound 19

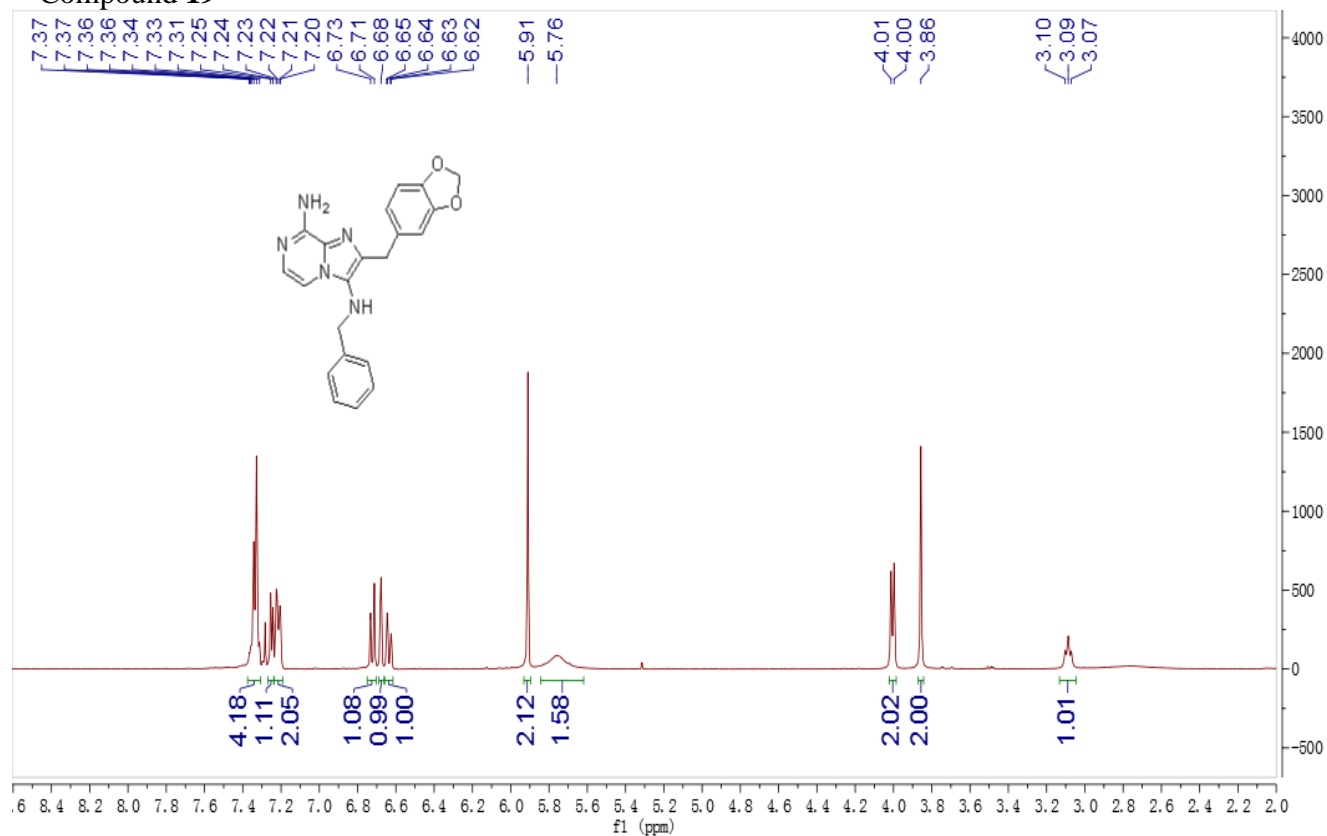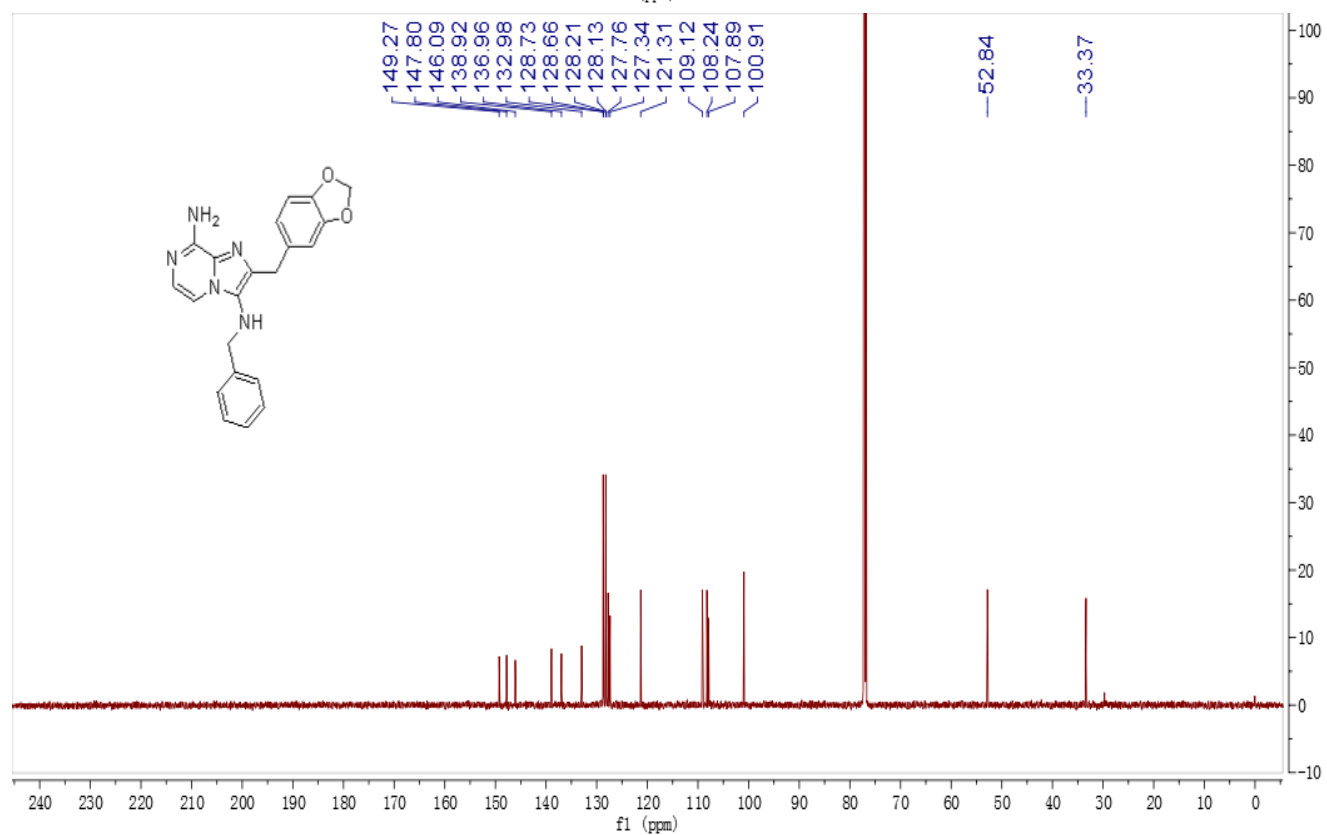



# Compound 20

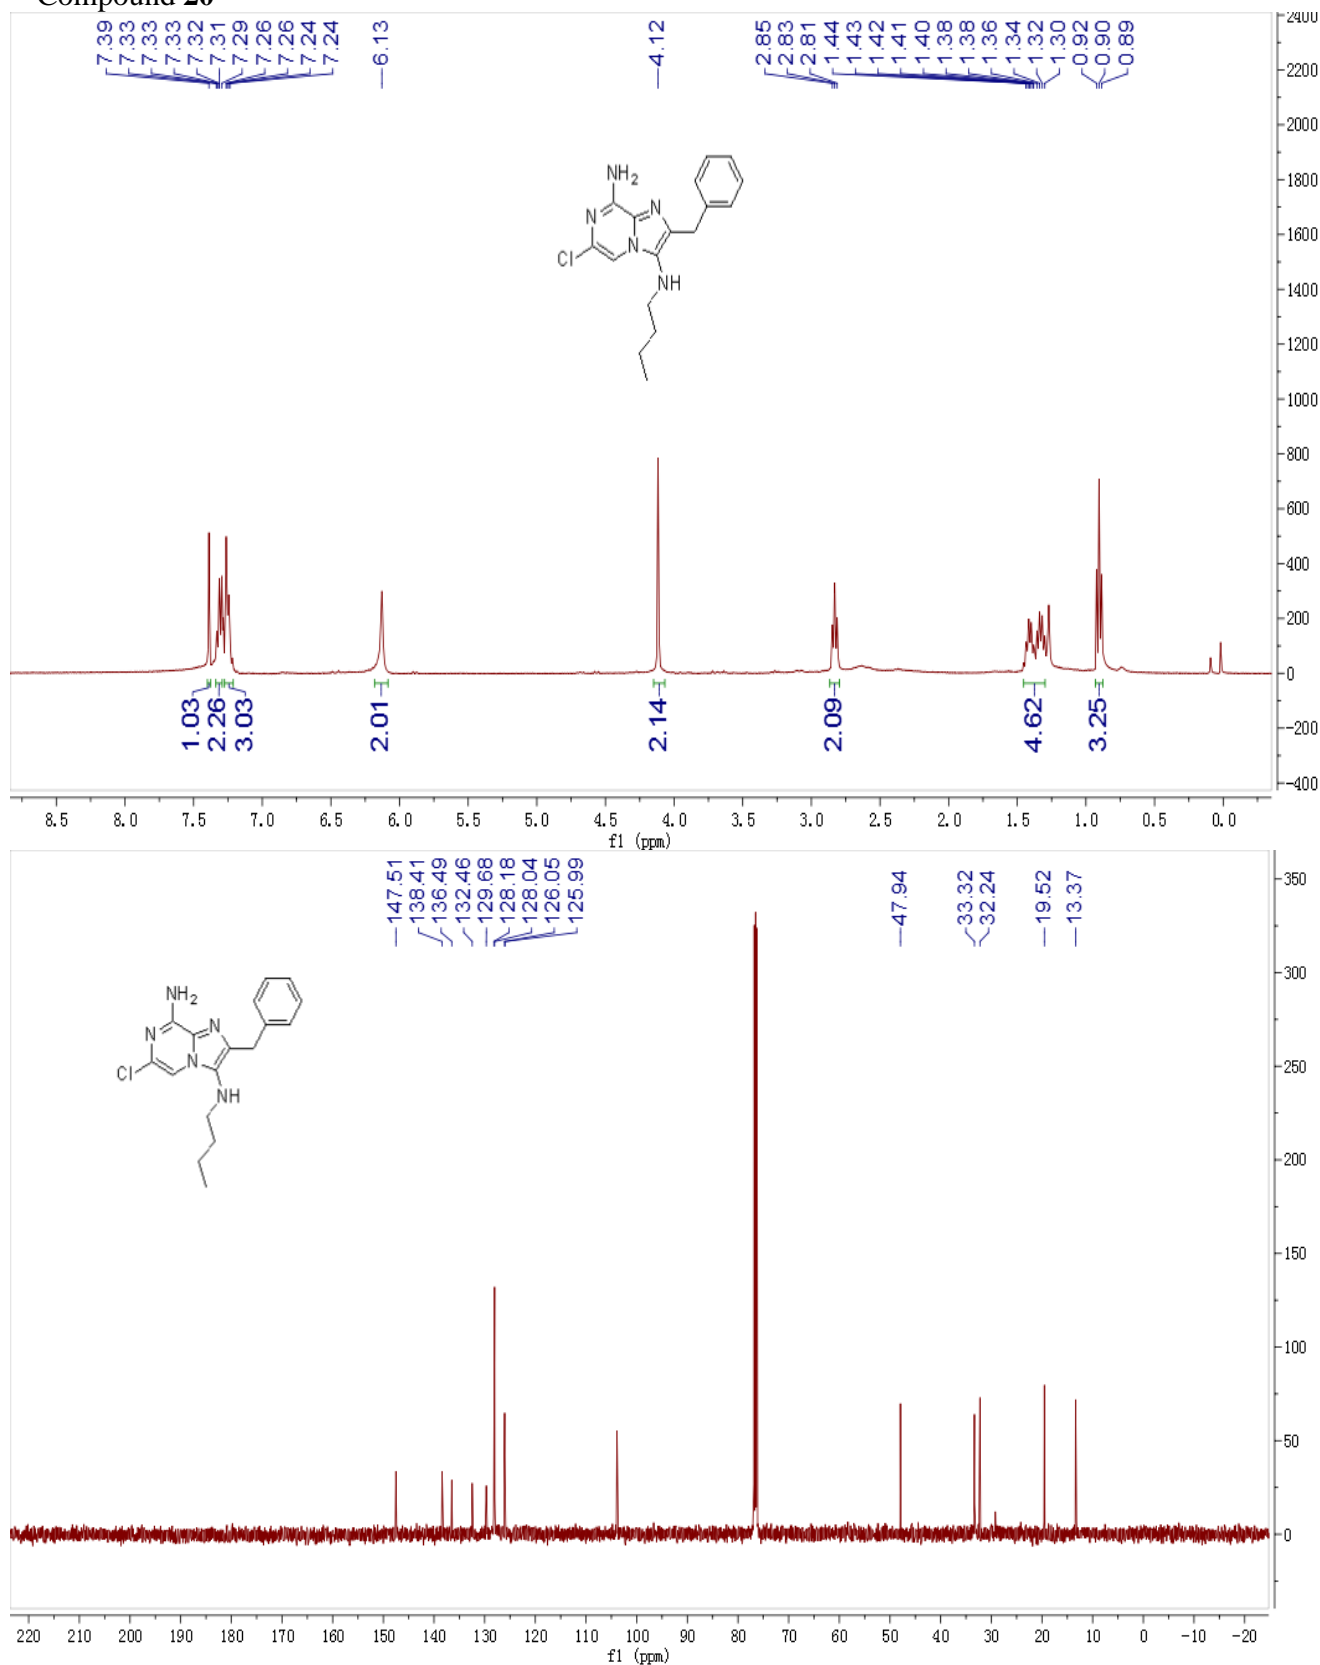

# Compound 21

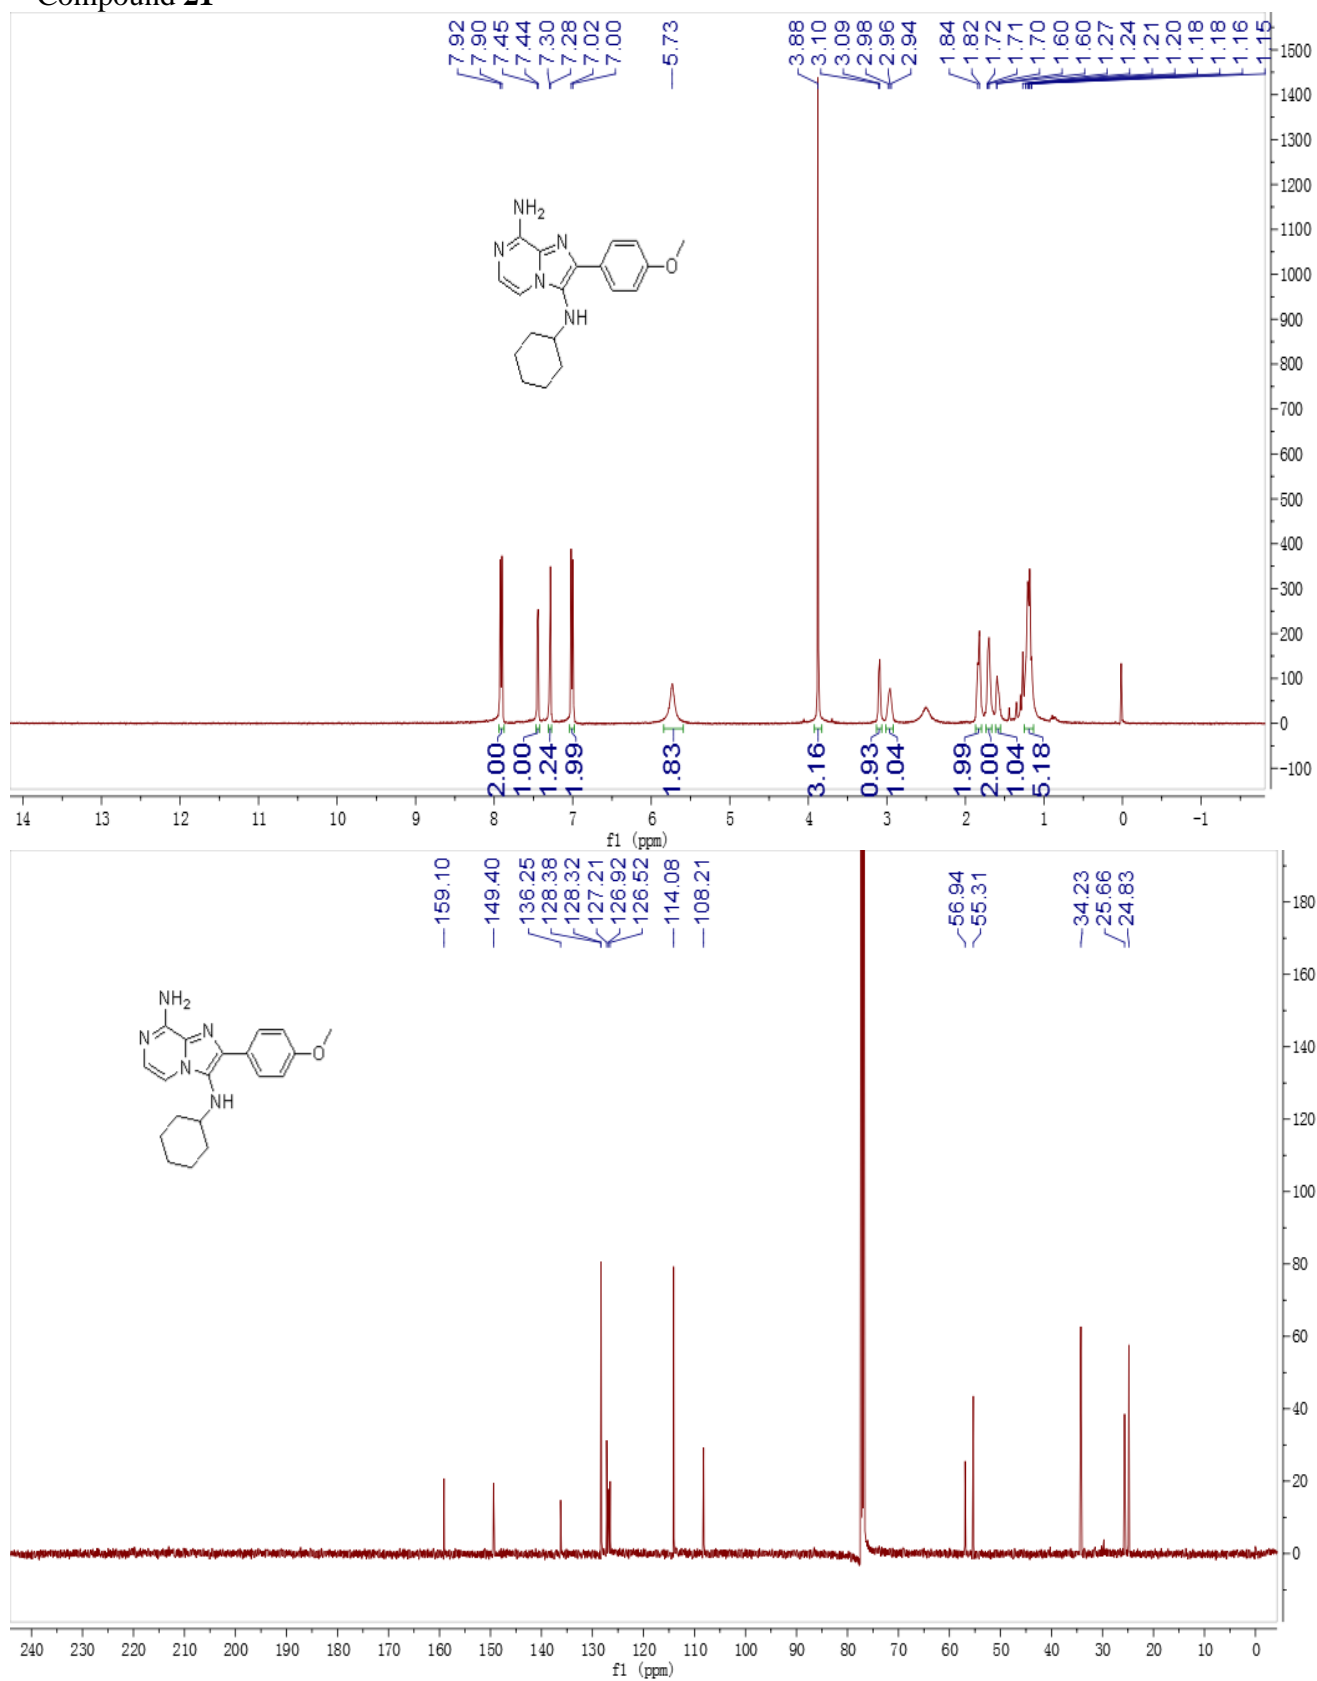

# Compound 22

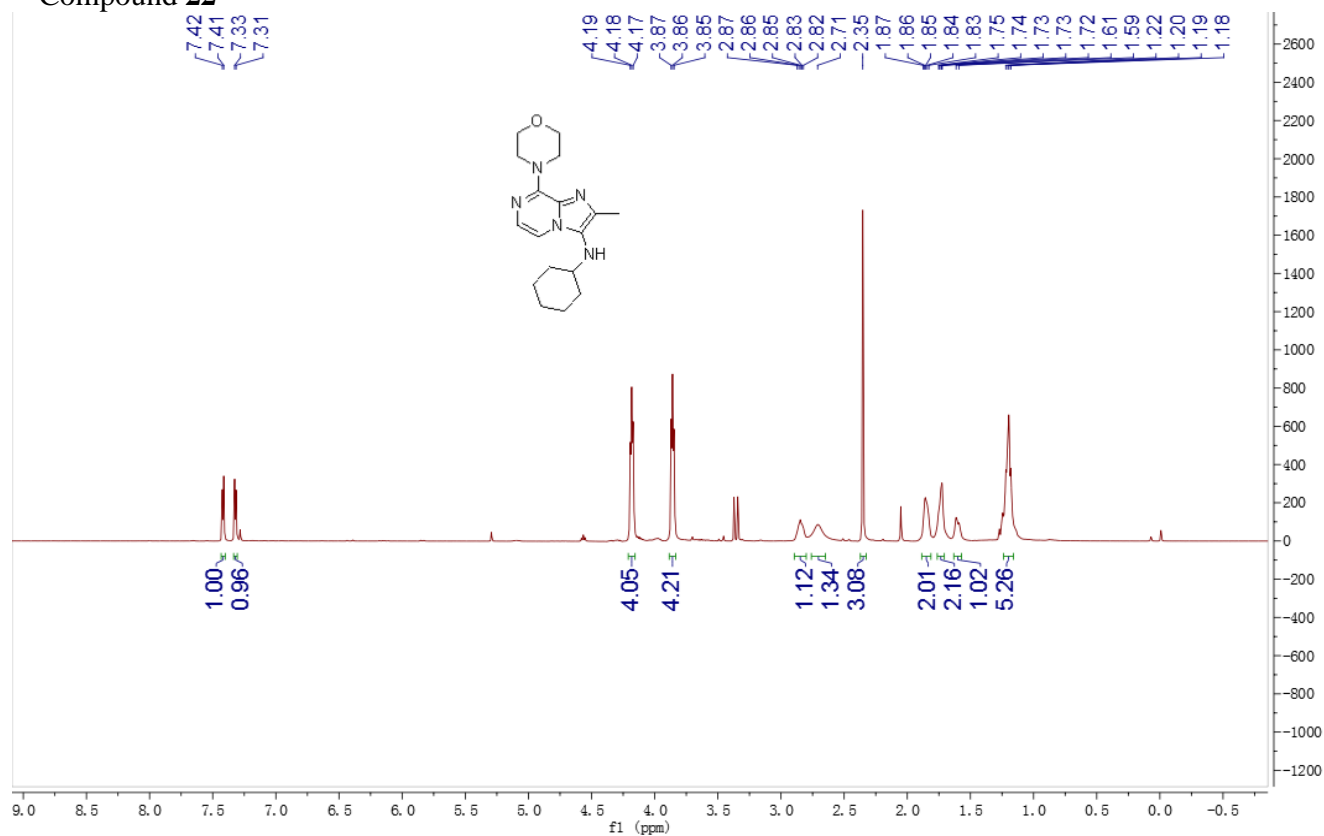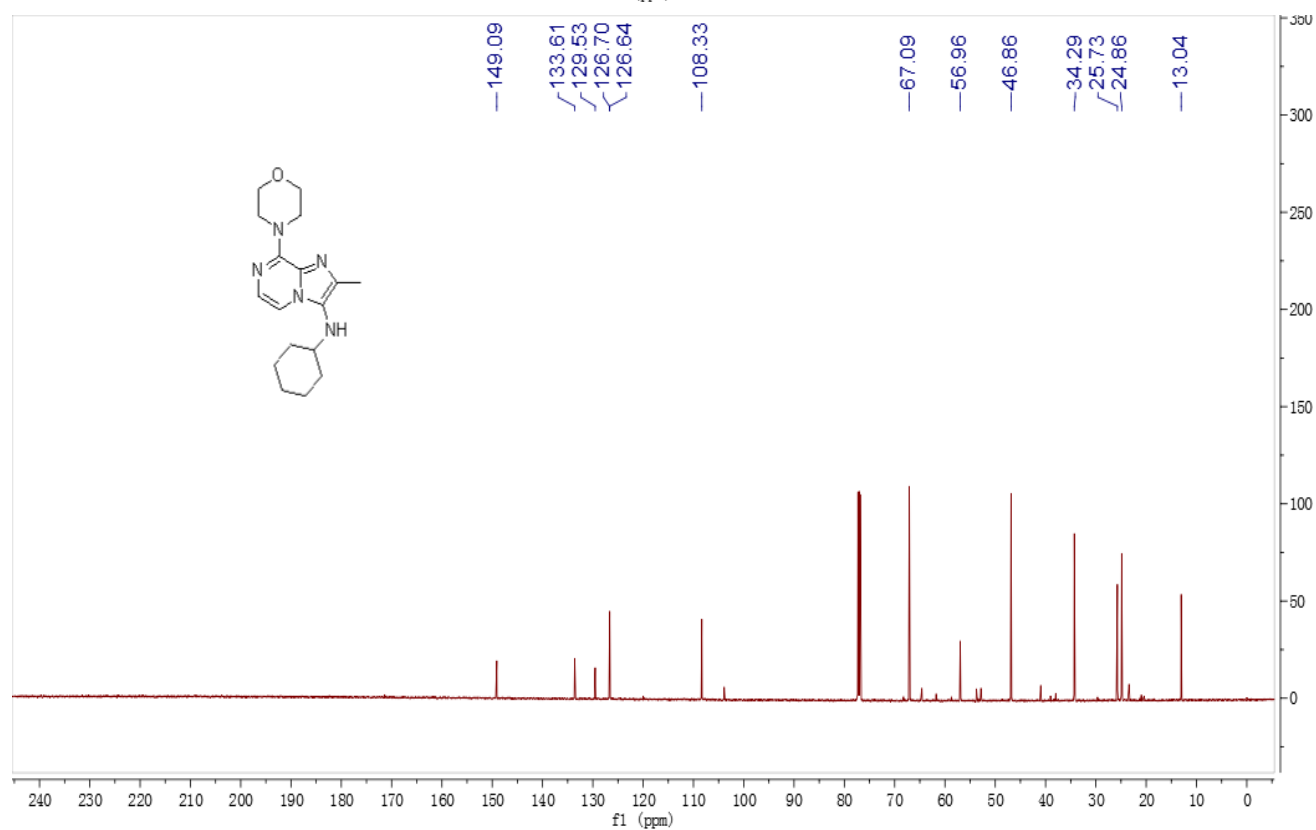

# Compound 23

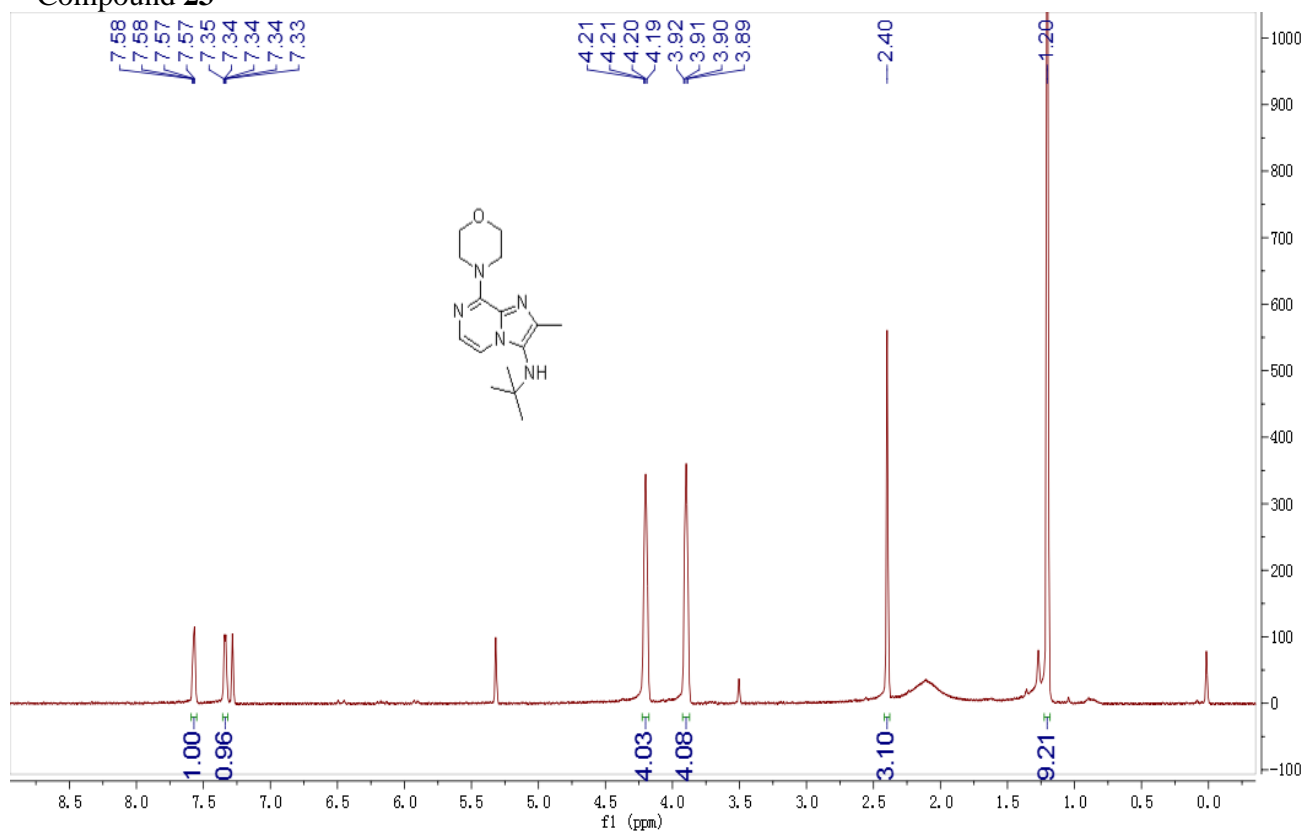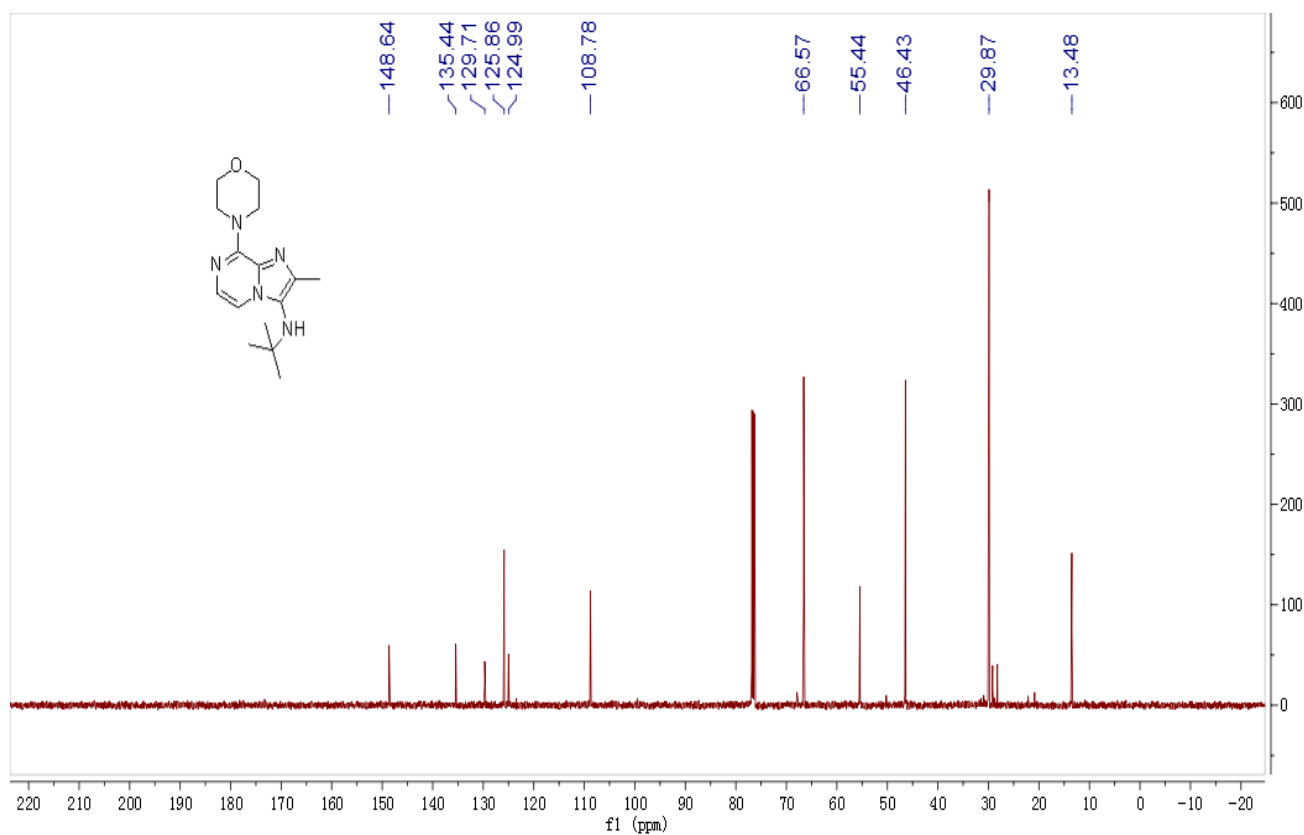

# Compound 24

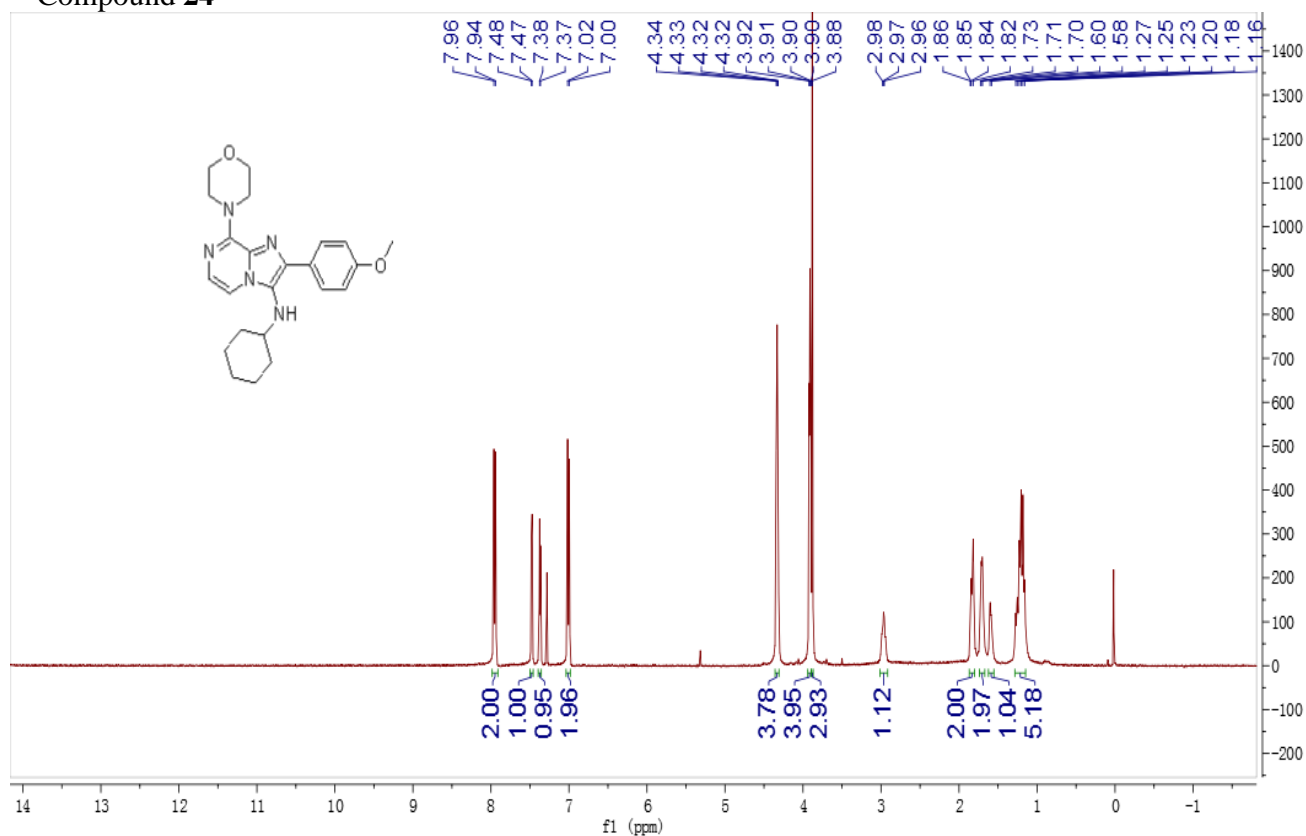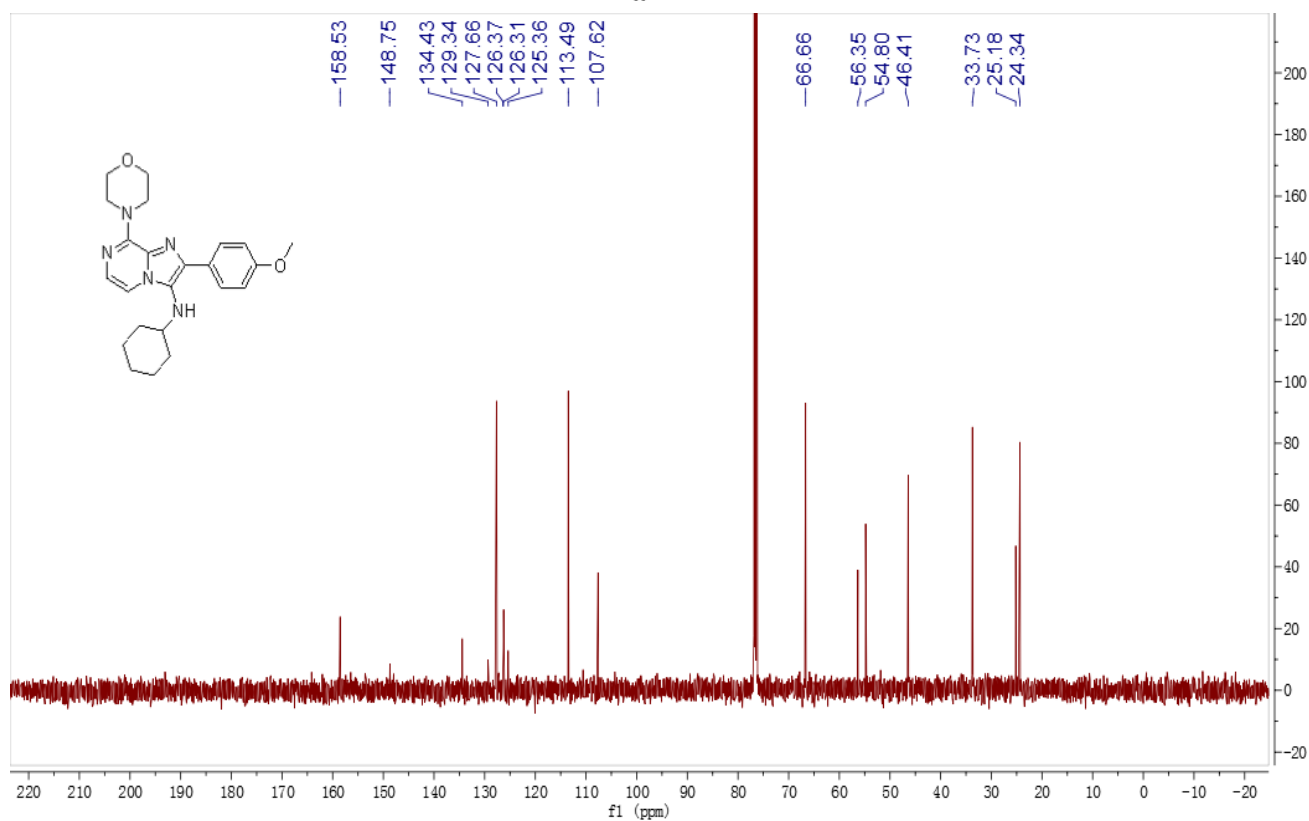

# Compound 25

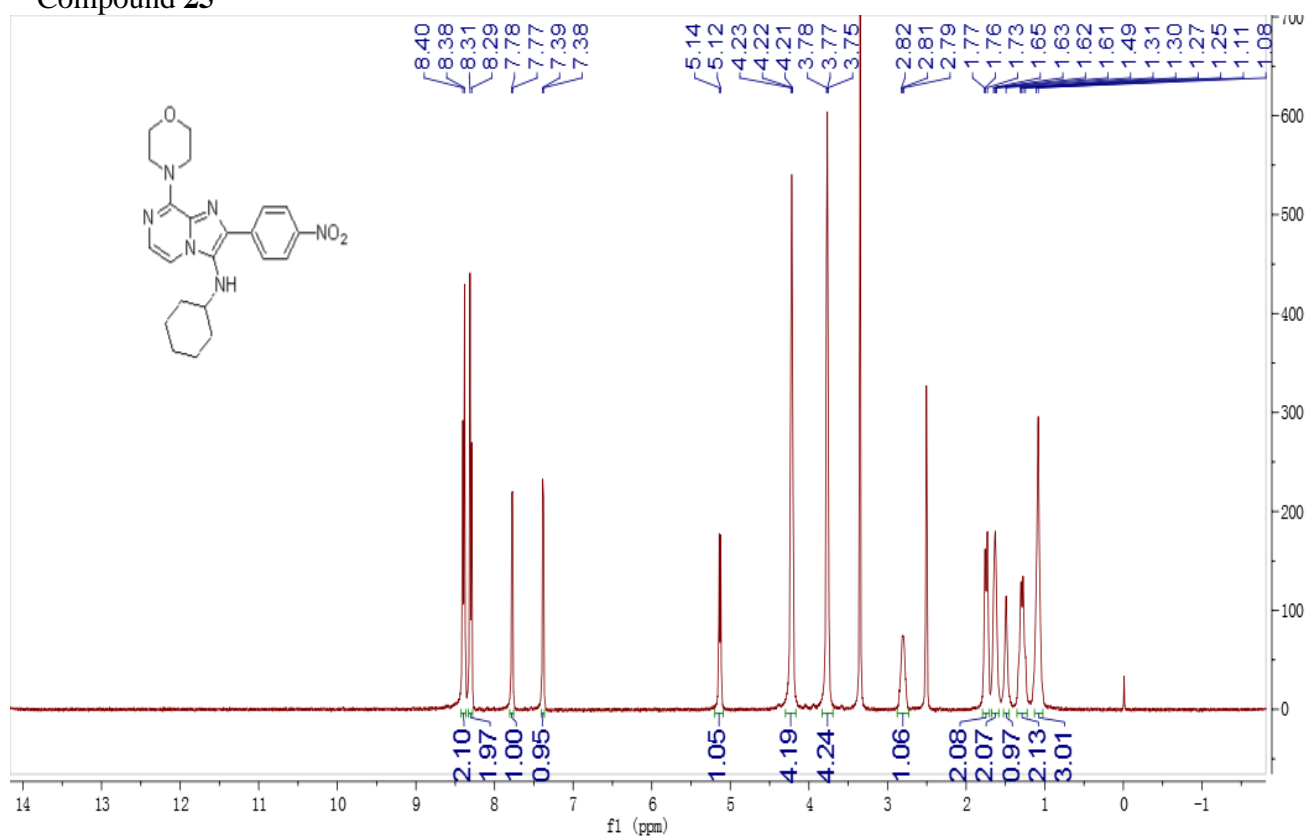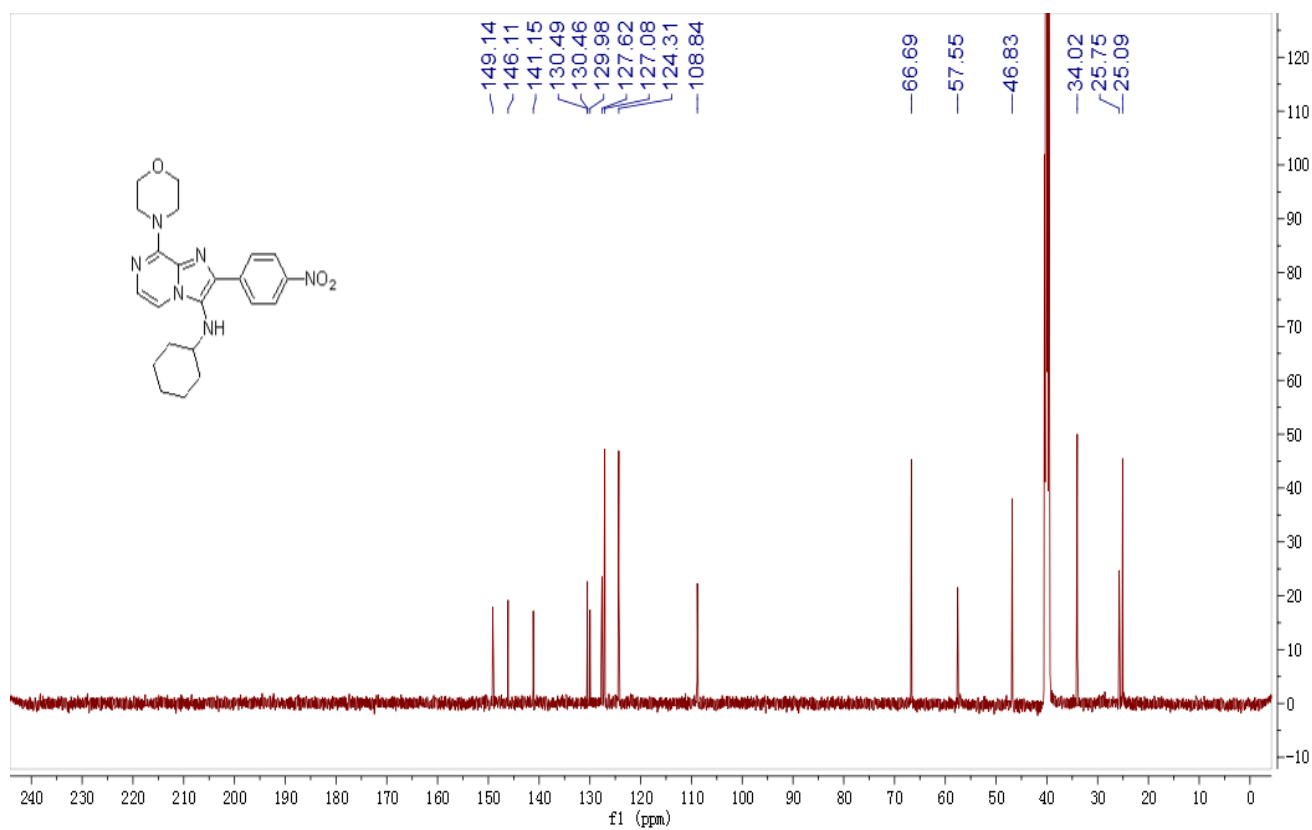

# Compound 26

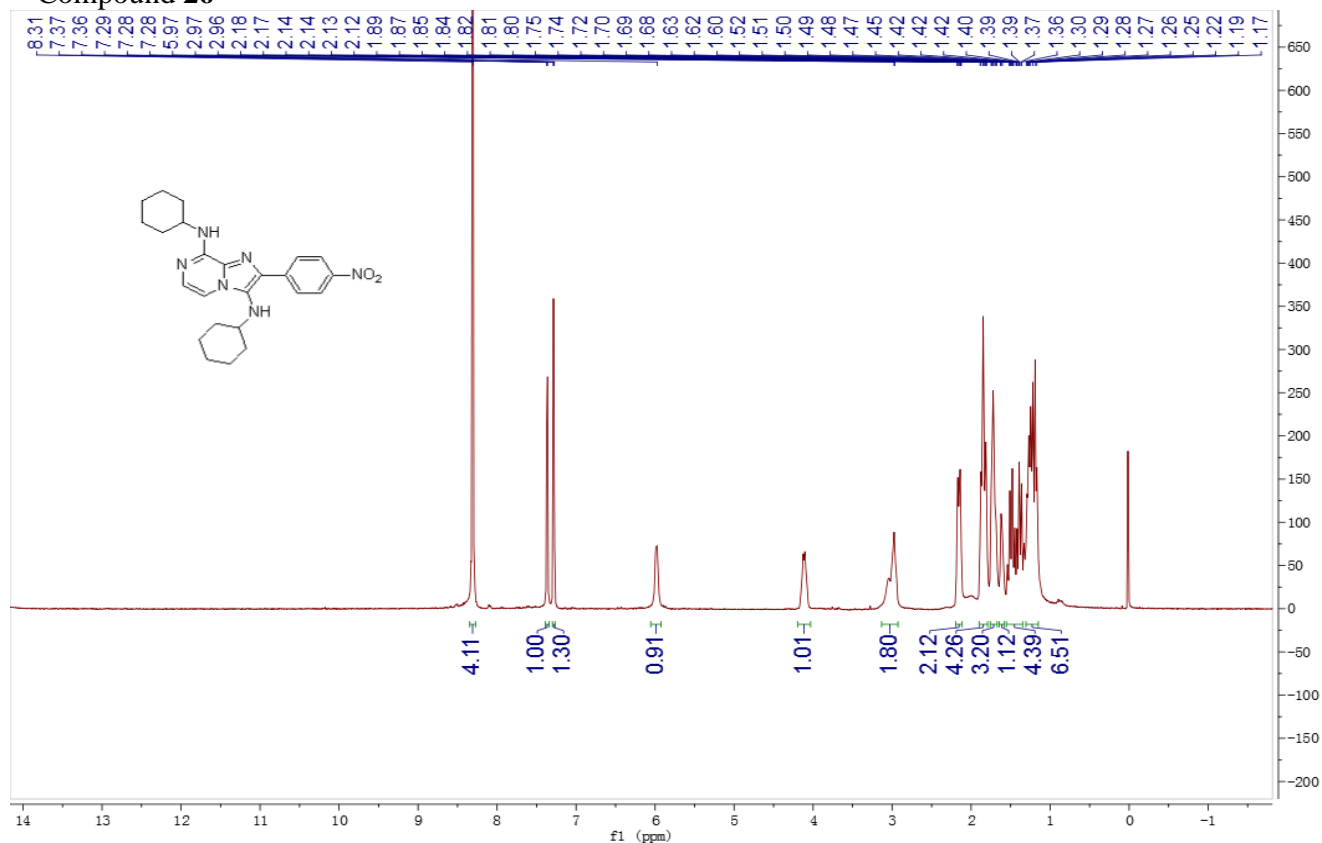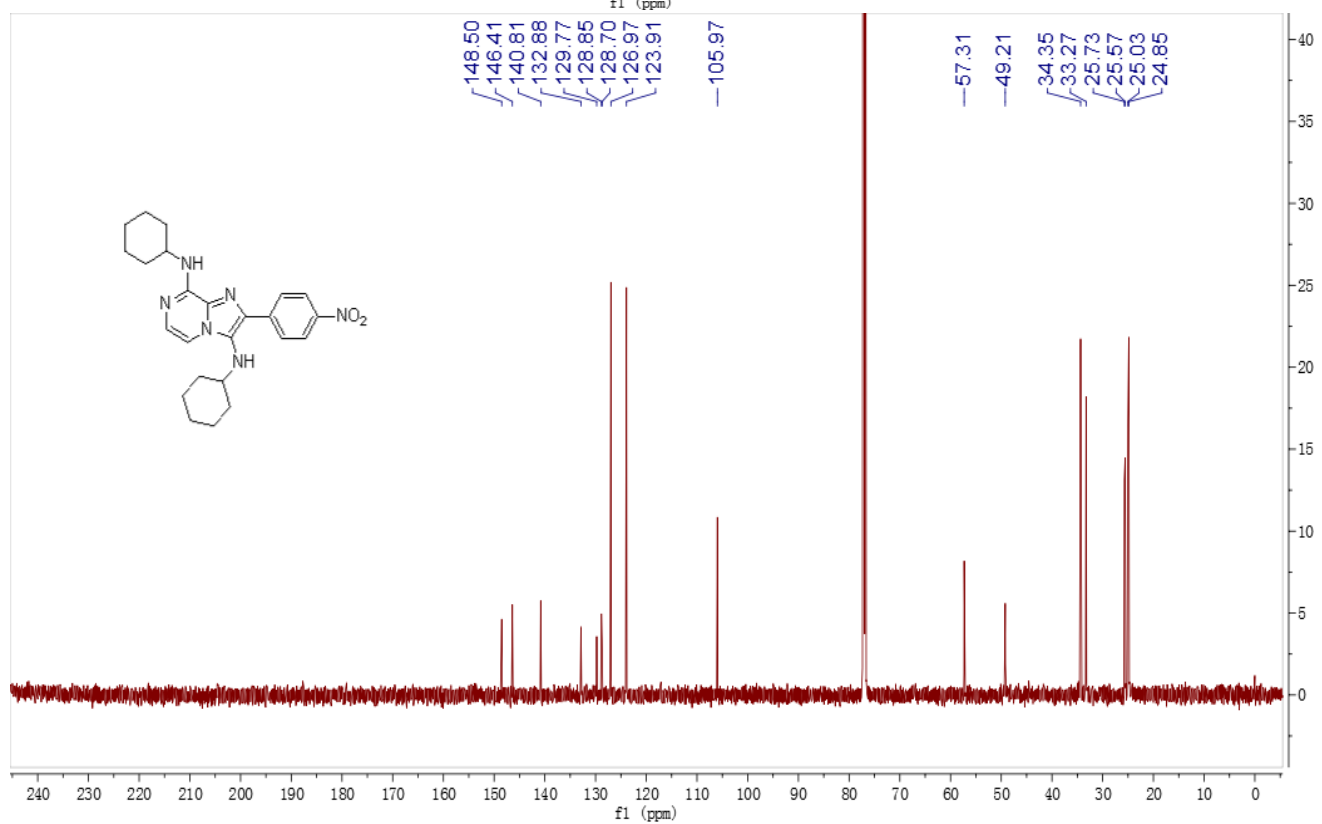

# Compound 29

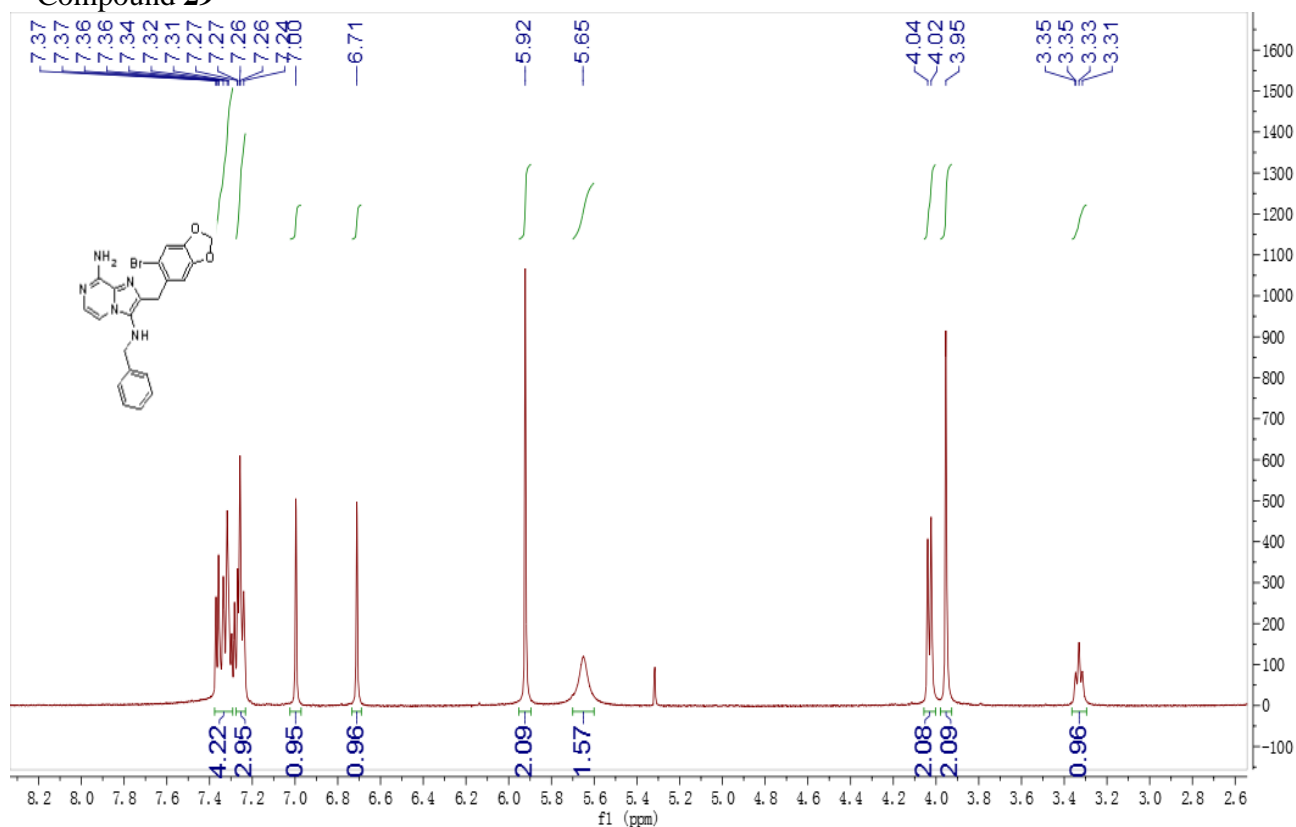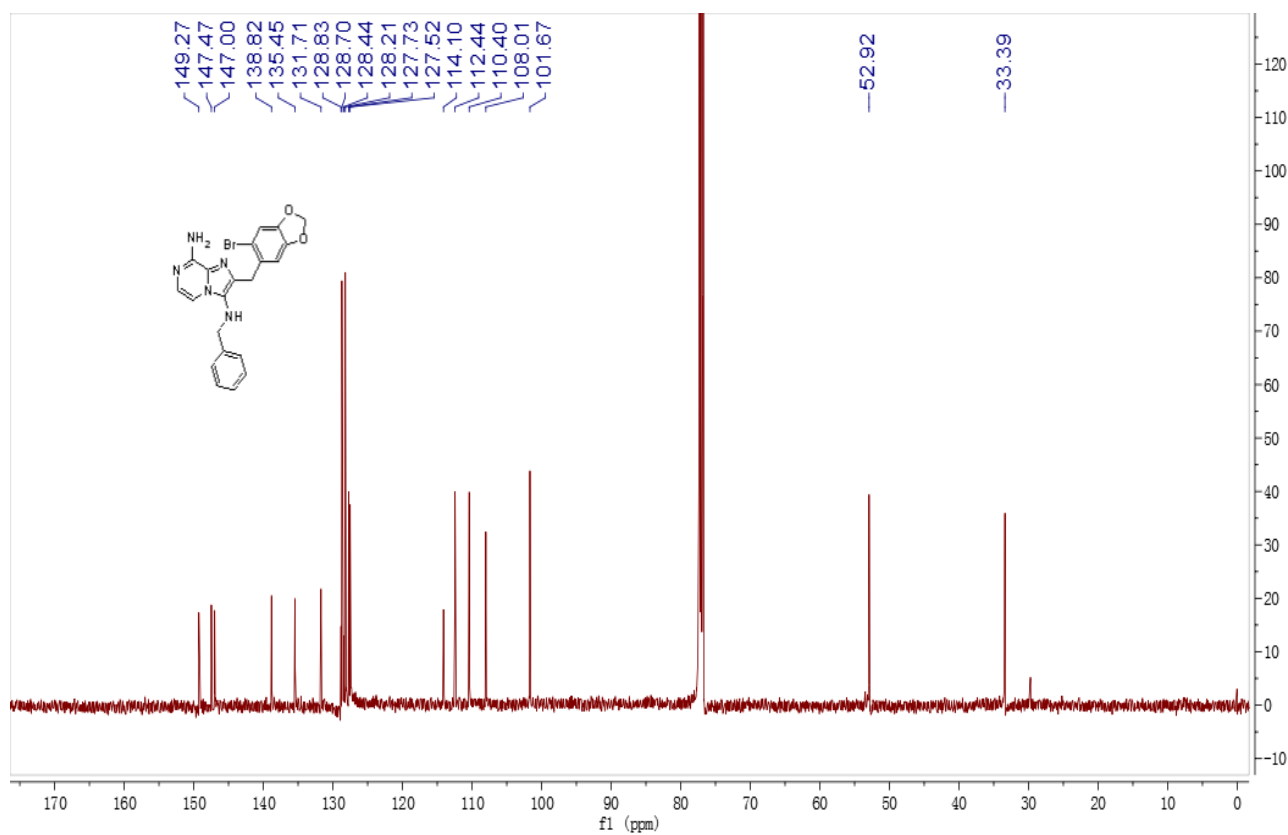



# Compound 30

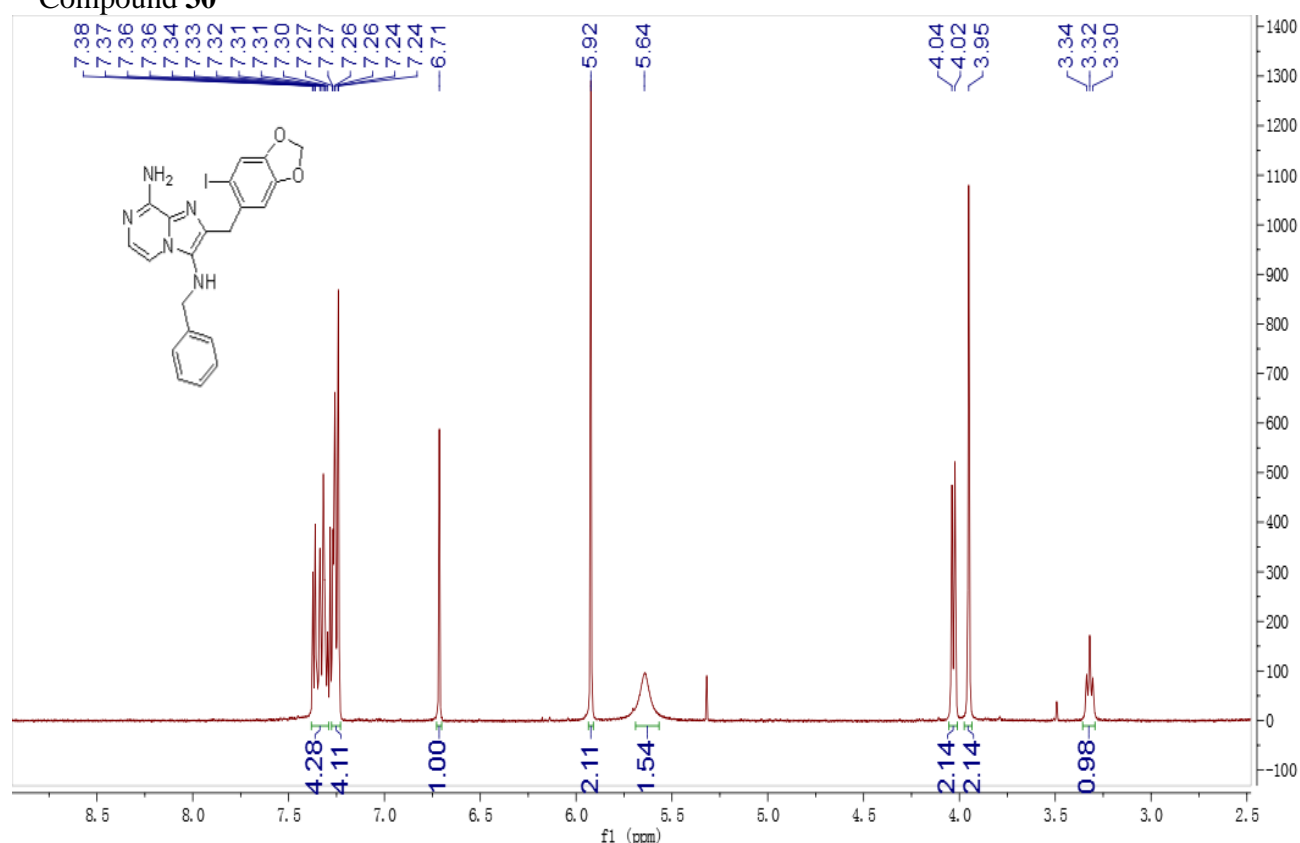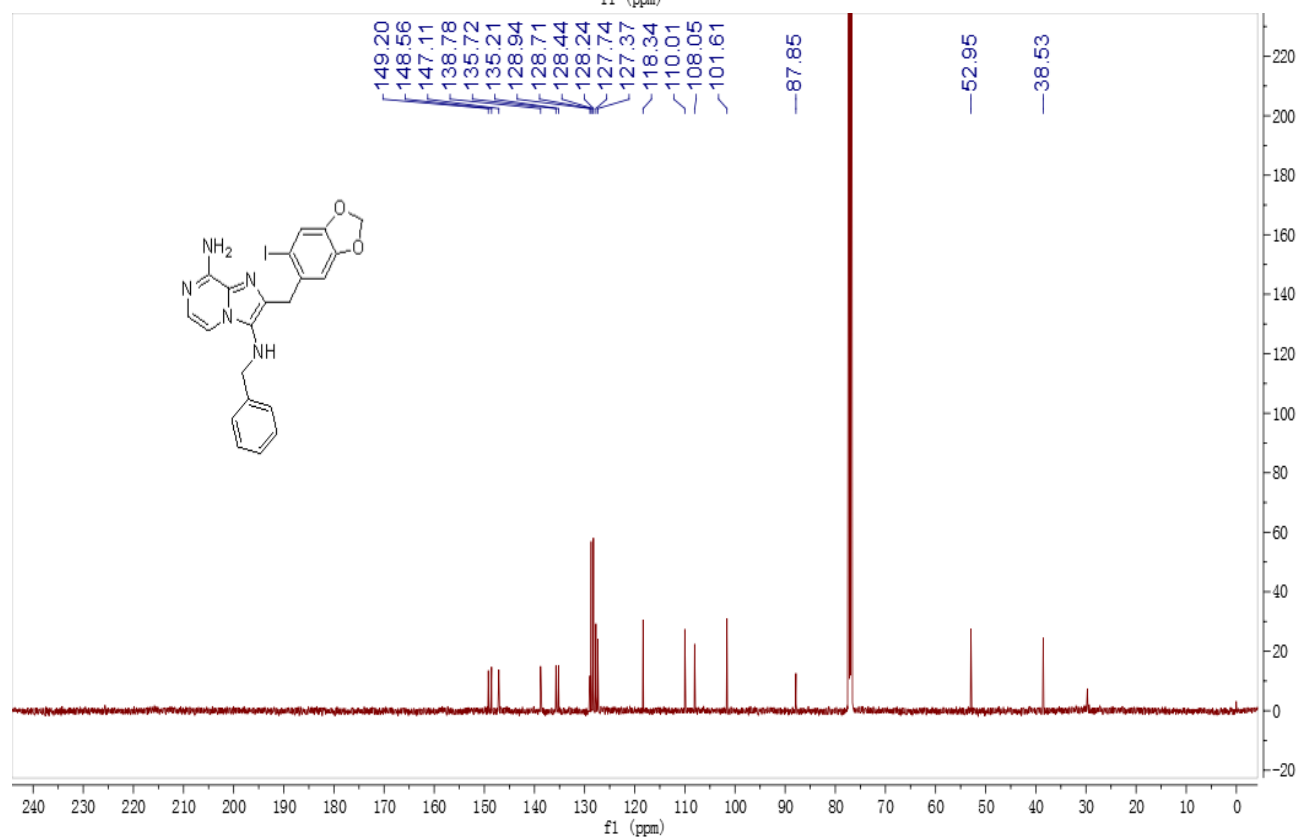

# Compound 31

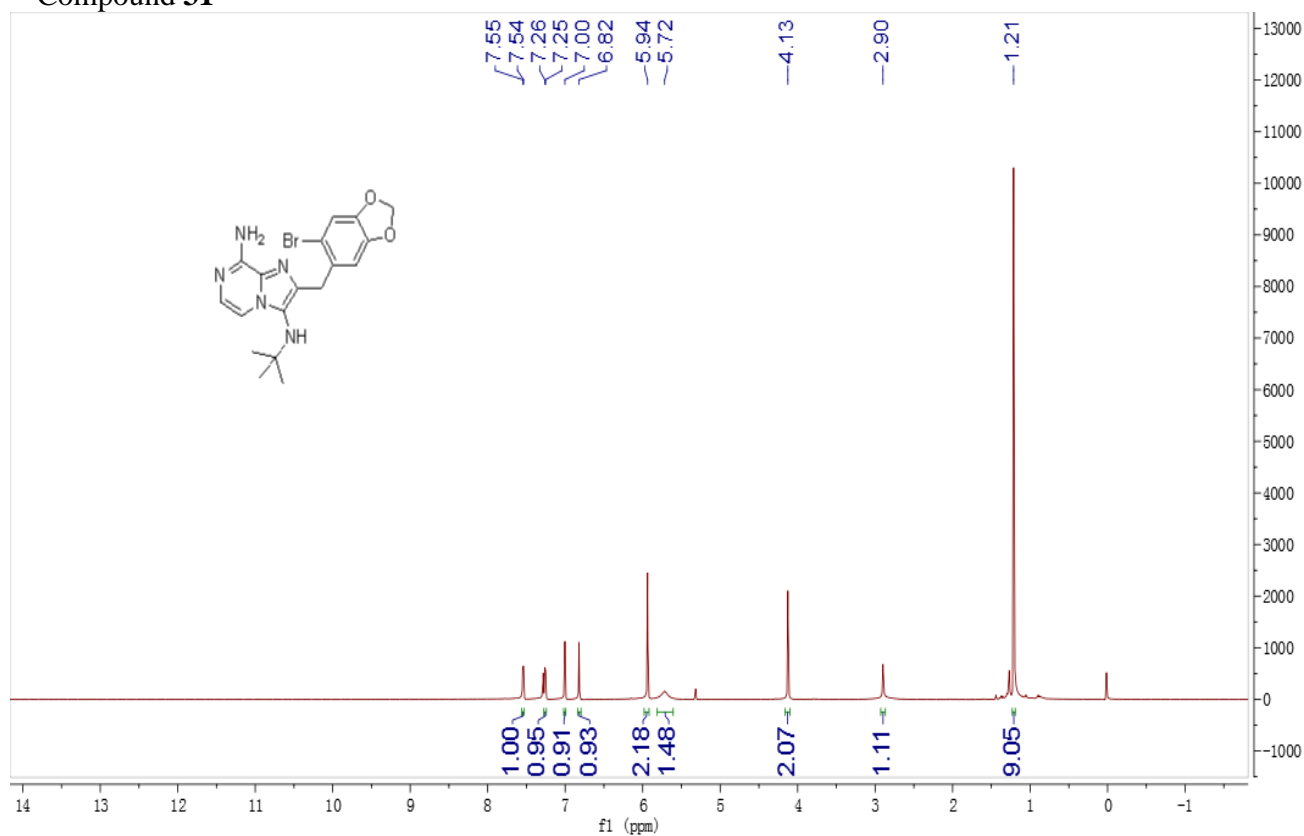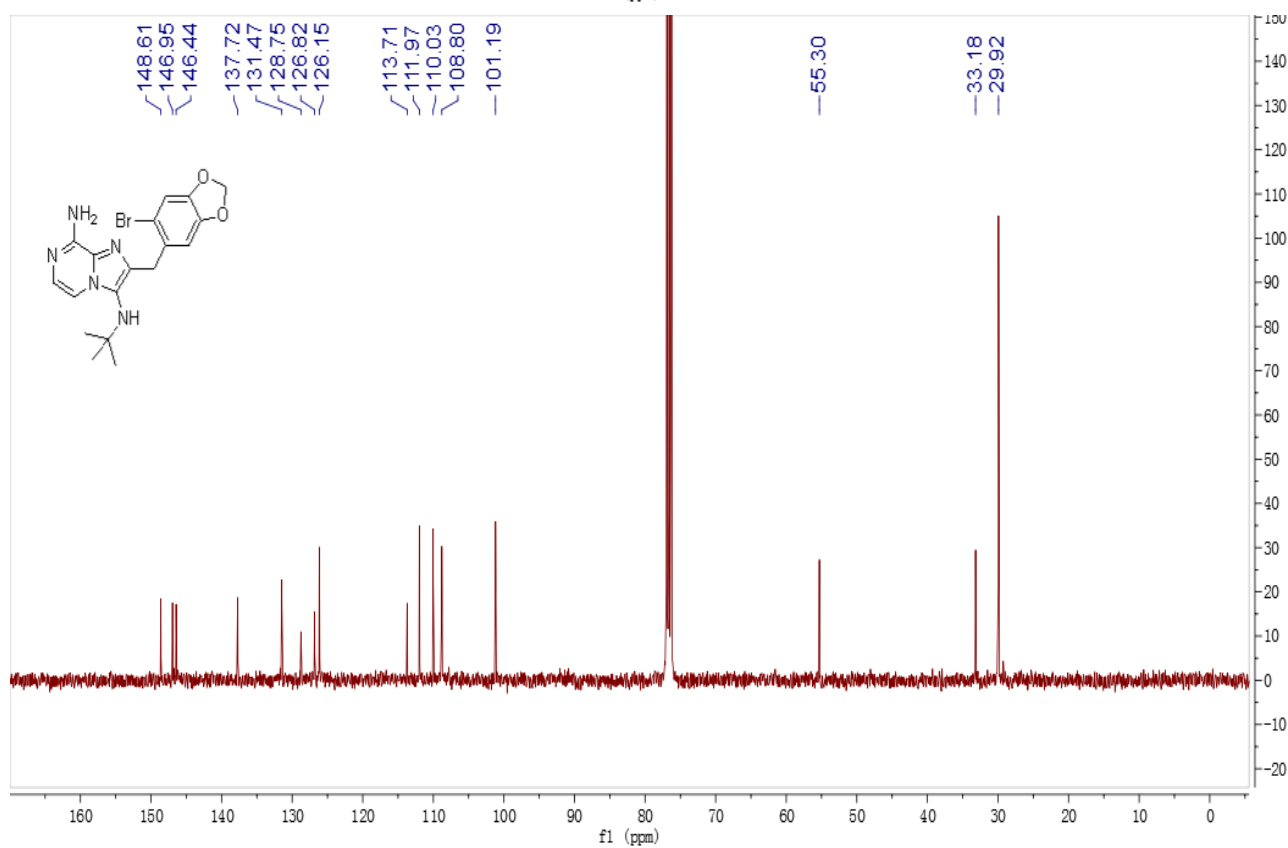

# Compound 32

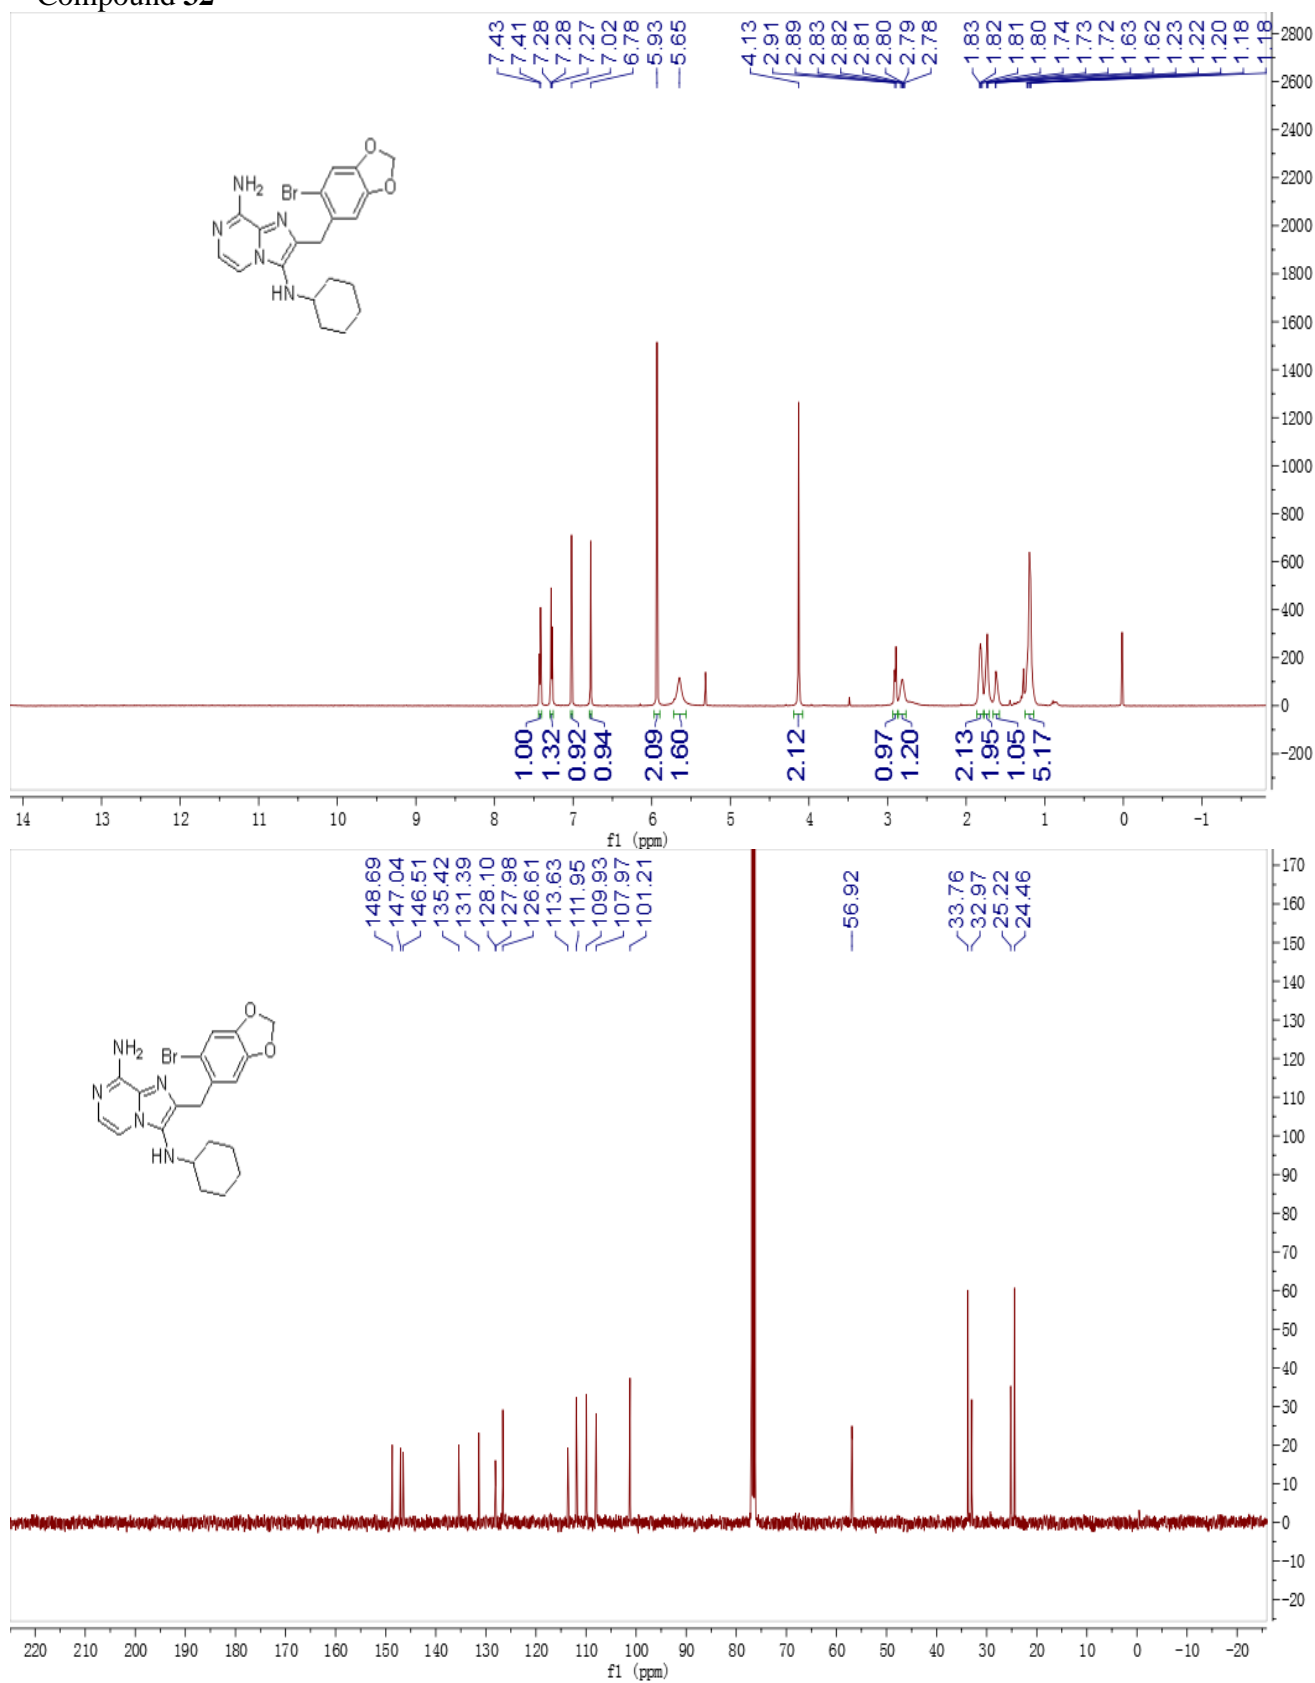

Compound **33**

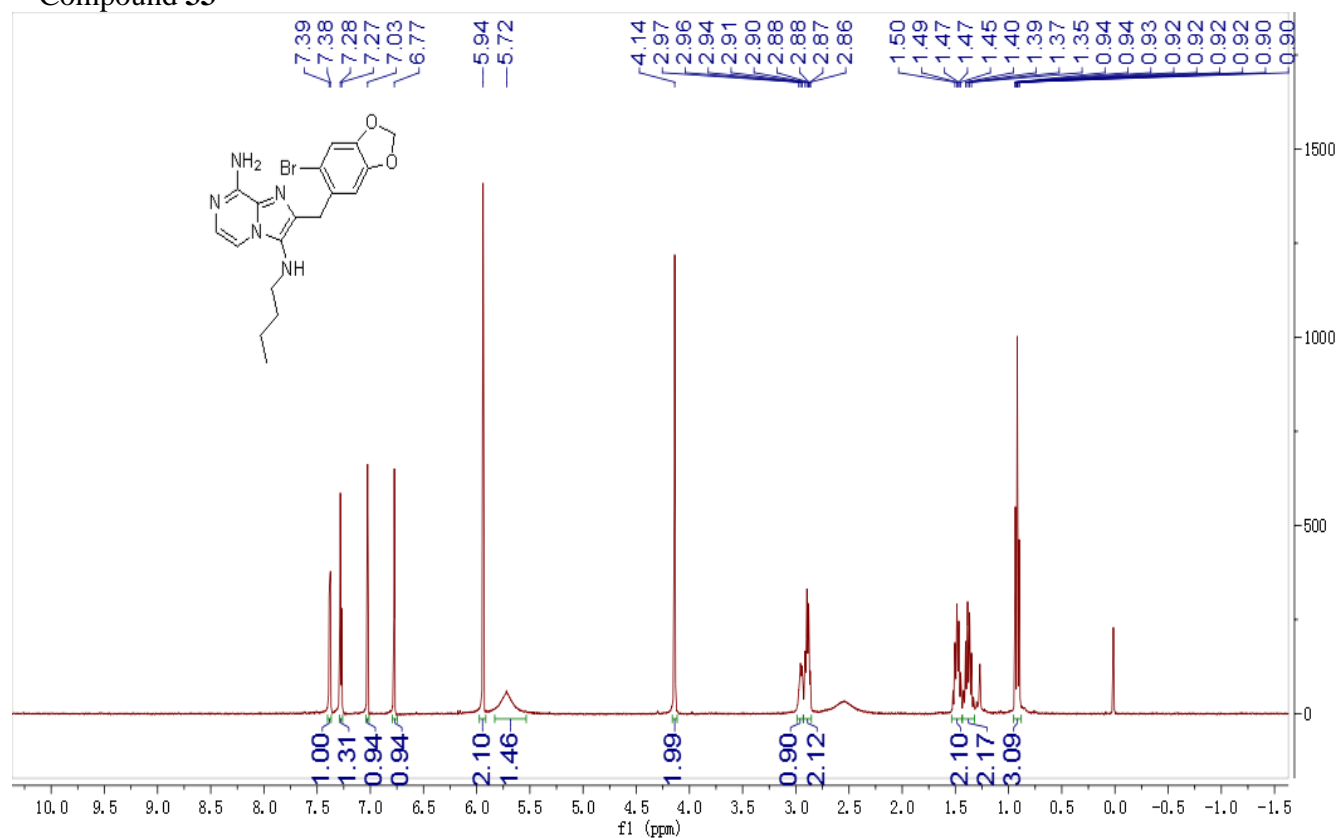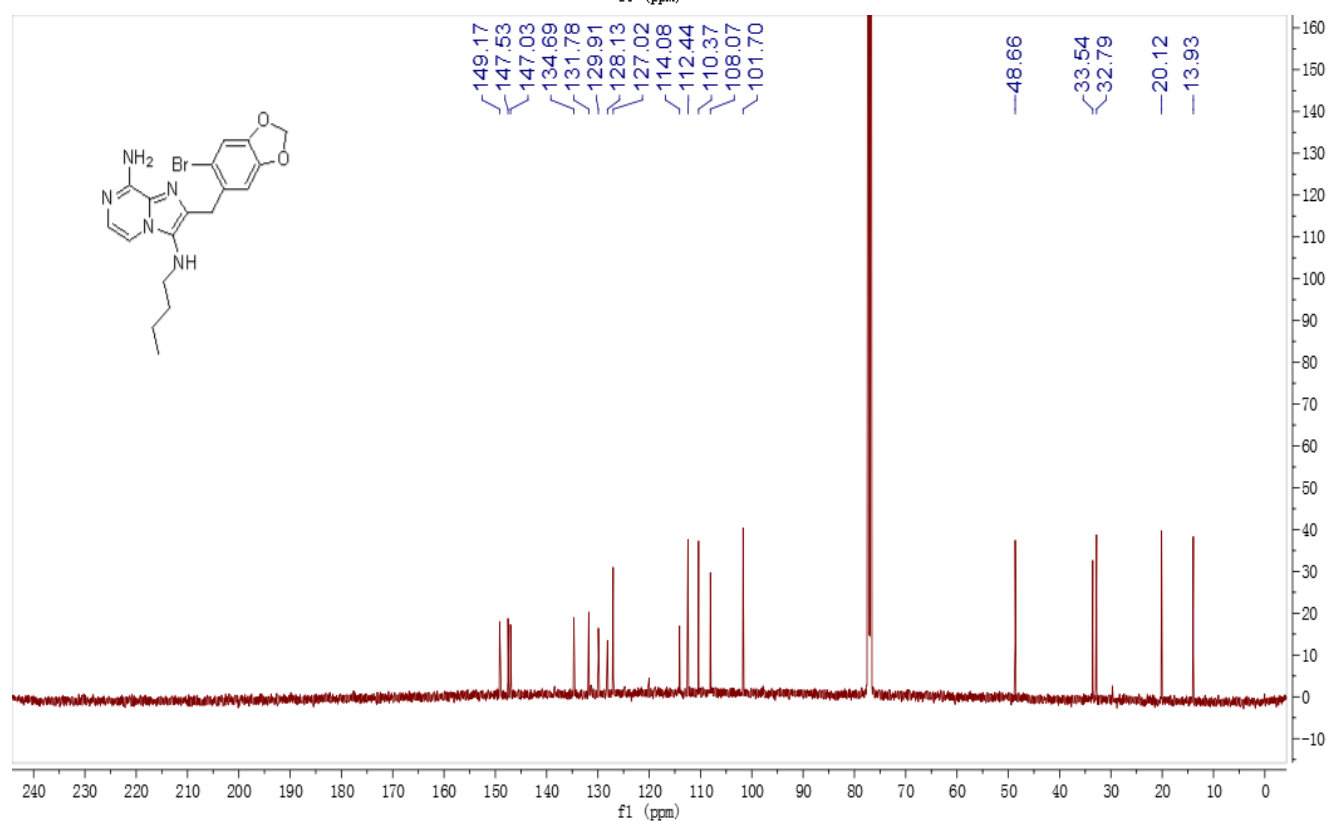

# Compound 34

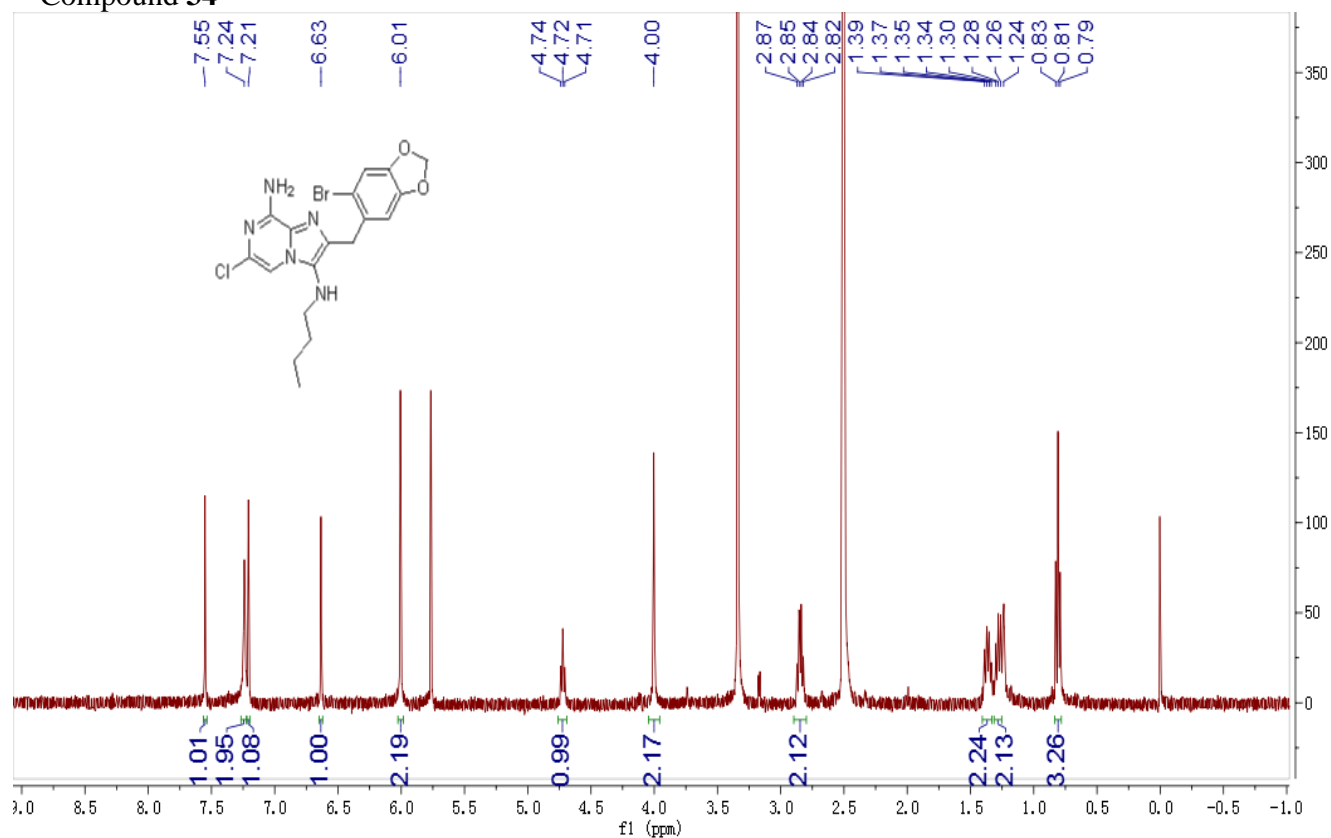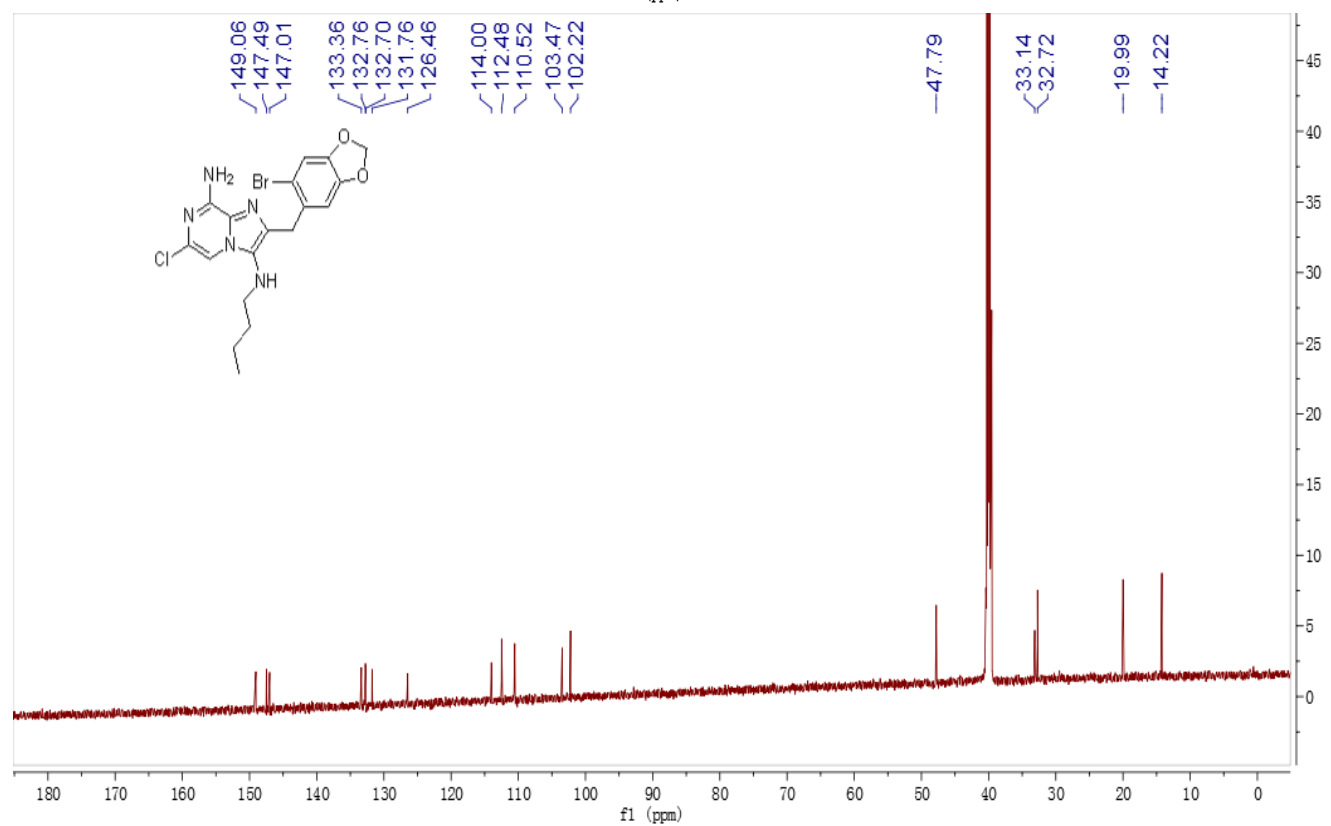

# Compound 35

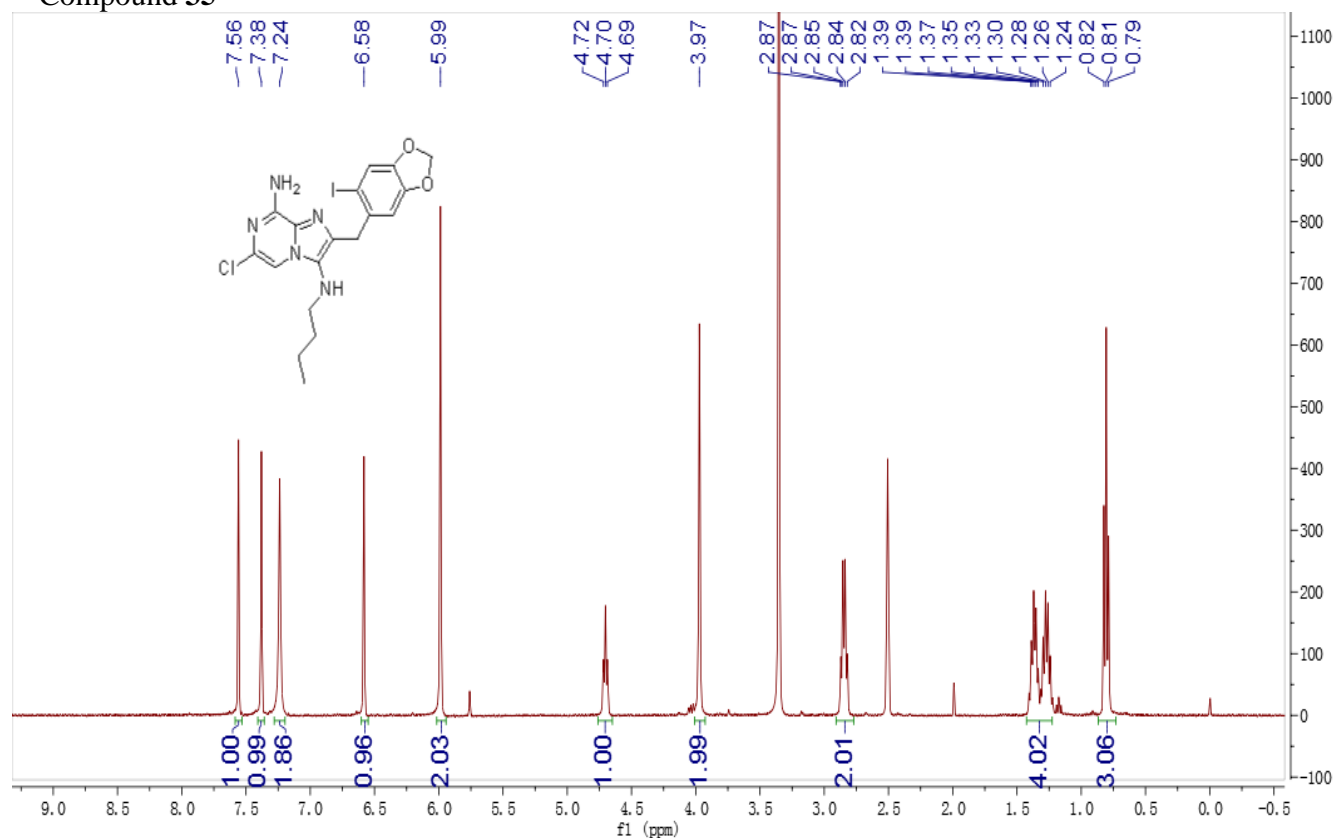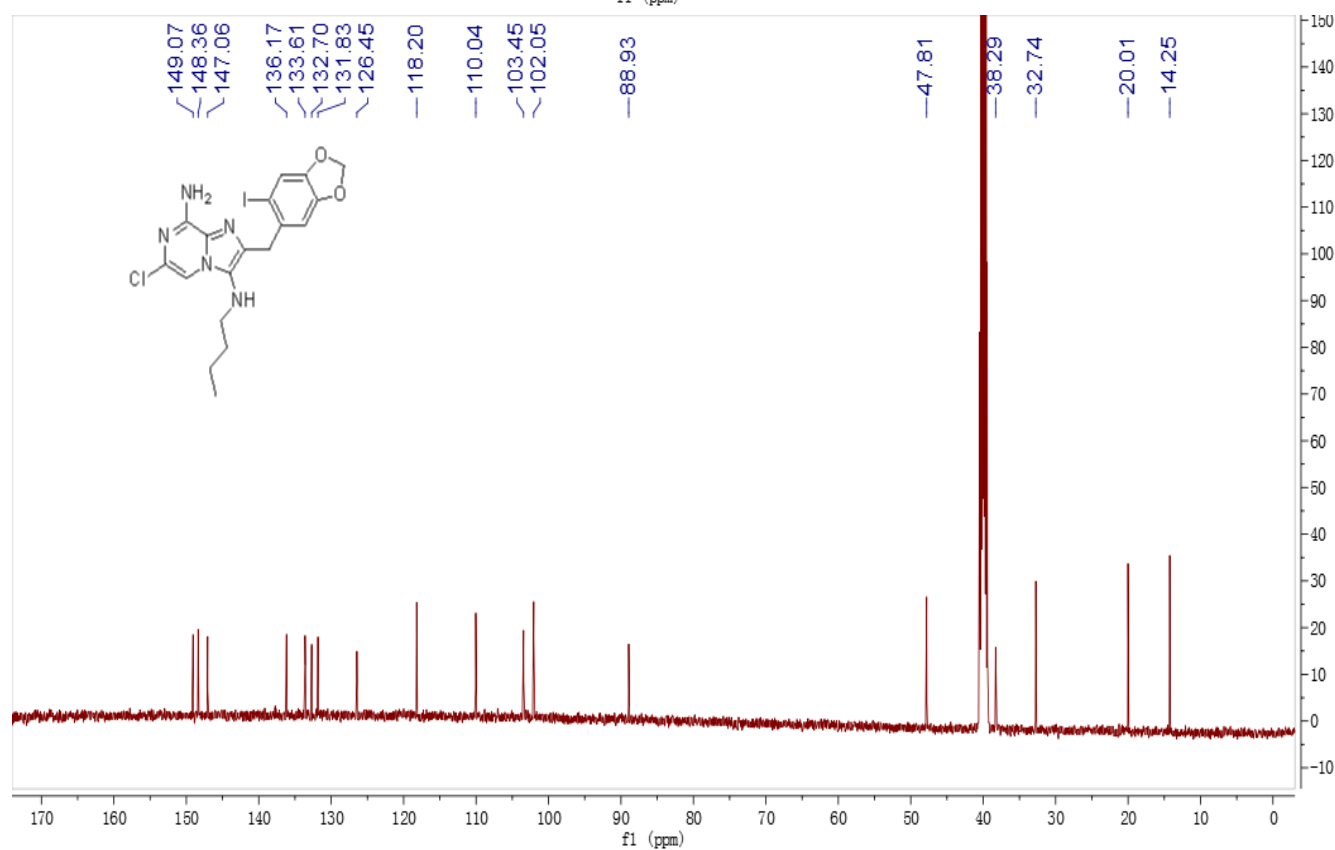

The end
